## The structure and flexibility analysis of the *Arabidopsis* Synaptotagmin 1 reveal the basis of its regulation at membrane contact sites

Juan Luis Benavente<sup>a</sup>, Dritan Siliqi<sup>b</sup>, Lourdes Infantes<sup>a</sup>, Laura Lagartera<sup>c</sup>, Alberto Mills<sup>d</sup>, Federico Gago<sup>d</sup>, Noemí Ruiz-López<sup>e</sup>, Miguel Ángel Botella<sup>e</sup>, María José Sánchez-Barrena<sup>a</sup> and Armando Albert<sup>a,\*</sup>

<sup>a</sup>Instituto de Química Física "Rocasolano", Consejo Superior de Investigaciones Científicas, Serrano 119, E-28006 Madrid, Spain. <sup>b</sup>Istituto di Cristallografia, Consiglio Nazionale delle Ricerche (CNR), Via G. Amendola 122/O, 70126 Bari, Italy. <sup>c</sup>Instituto de Química Médica (IQM). Consejo Superior de Investigaciones Científicas, Juan de la Cierva 3, E-28006 Madrid, Spain. <sup>d</sup>Área de Farmacología, Departamento de Ciencias Biomédicas, Unidad Asociada al IQM-CSIC, Universidad de Alcalá, E-28805 Alcalá de Henares, Madrid, Spain. <sup>e</sup>Departamento de Biología Molecular y Bioquímica. Instituto de Hortofruticultura Subtropical y Mediterránea "La Mayora", Universidad de Málaga-Consejo Superior de Investigaciones Científicas (IHSM-UMA-CSIC), Universidad de Málaga, Campus de Teatinos, 29071 Málaga, Spain.

\*To whom correspondence should be addressed: E-mail: [xalbert@iqfr.csic.es](mailto:xalbert@iqfr.csic.es)

Authors Contributions: JL-B, LI, DS, FG and AM performed experiments; M-JS-B, FG, NR-L, M-AB and AA designed and supervised the Project; JL-B, M-AB, FG, M-JS-B and AA wrote the manuscript.

The authors declare no conflict of interest.

This article contains supporting information.

**Data Deposition:** The atomic coordinates and structure factors have been deposited in the Protein Data Bank, <https://www.pdb.org/> [PDB ID codes Ca<sup>2+</sup> and Cd<sup>2+</sup> complexes of

SYT1C2A (7AS6 and 7ATP, respectively)]. The final SAXS models were deposited and are available at SASBDB <https://www.sasbdb.org/> [ID codes SASDKG6 for the SMP2C2A construct SASDKJ9 for the C2AB construct and SASDKK9 in presence of Ca<sup>2+</sup>]

**Keywords:** Abiotic stress; Extended Synaptotagmins; Lipid transport; Membrane contact sites; Protein structure

**This PDF file includes:** Main Text, Figures 1 to 7 Table 1

## Abstract

Cell function requires the maintenance of membrane lipid homeostasis as changes in cellular environment unbalance this equilibrium. The non-vesicular lipid transfer at endoplasmic reticulum (ER) and plasma membrane (PM) contact sites (CS) is central to restore it. Extended synaptotagmins (E-Syts) are ER proteins that play a central role in this process as they act as molecular tethers with PM and as lipid transfer proteins between these organelles. E-Syts are constitutively anchored to the ER through an N-terminal hydrophobic segment and bind to the PM via C-terminal C2 domains. In plants, synaptotagmins (SYTs) are orthologous of E-Syts and regulate the ER-PM communication by the activity of their two C2 domains in response to abiotic stresses. We have combined macromolecular crystallography, small-angle X-ray scattering, structural bioinformatics and biochemical data to analyze the regulation of plant synaptotagmin 1 (SYT1). Our data show that the binding of SYT1 to the PM is regulated by the interaction of the first C2 domain through a  $\text{Ca}^{2+}$ -dependent lipid binding site and by a site for phosphorylated forms of phosphatidylinositol in such a way that two different molecular signals are integrated in response to stress. In addition, our data show that SYT1 is highly flexible by virtue of up to three hinge points, including one that connects the two C2 domains. This feature provides conformational freedom to SYT1 to define a large and complementary interaction surface with the PM. This structural plasticity, in turn, may facilitate lipid extraction, protein loading and subsequent transfer between PM and ER.

## Introduction

In plants, abiotic stress induces changes in lipid homeostasis that lead to plasma membrane (PM) instability; consequently, plants tend to readjust lipid composition by the action of enzymes involved in lipid modification or by promoting lipid transfer between the membranes of different organelles (Hou et al., 2016; Zhu, 2016). Endoplasmic reticulum (ER) PM contact sites (CS) have a central role to achieve this objective as they have been shown to act as subcellular platforms to integrate intracellular molecular stress signals and non-vesicular lipid transfer (Lee et al., 2019; Lee et al., 2020; Perez-Sancho et al., 2015; Ruiz-Lopez et al., 2020; Schapire et al., 2009). CS consist of narrow appositions of plasma and ER membranes, ranging from 10 to 30 nm, that rely on the regulated localization of different molecular tethers and lipid transfer proteins (Collado et al., 2019; Fernandez-Busnadiego et al., 2015; Kraubeta and Haucke, 2016; Wong et al., 2018).

The molecular players controlling ER–PM connectivity at CS are evolutionarily conserved in all eukaryotic systems and they develop equivalent biochemical functions in different organisms (Saheki, 2017; Saheki and De Camilli, 2017a). Among them, the extended synaptotagmins (E-Syts) represent a family of conserved ER-localized proteins that

display a dual function as molecular tethers between ER and PM and as lipid transfer proteins at CS (Saheki and De Camilli, 2017b; Wong et al., 2018). E-Syts decode the presence of phosphorylated phosphatidylinositol lipids (PIP) at the PM and intracellular levels of calcium ion ( $\text{Ca}^{2+}$ ) and, as a result, they enhance their interaction with PM and trigger lipid transport (Bian et al., 2018; Collado et al., 2019; Lee et al., 2019; Saheki et al., 2016). Plant synaptotagmins (SYTs) are orthologs of the mammalian E-Syts and trigger the increase of connectivity and expansion of CS in response to salt (Lee et al., 2019) and rare earth elements (Lee et al., 2020) or different forms of mechanical stress (Perez-Sancho et al., 2015).

At the molecular level, E-Syts consist of a hydrophobic segment inserted in the ER followed by a synaptotagmin-like mitochondrial-lipid binding protein (SMP) domain linked to a number of C2 domains (Giordano et al., 2013; Min et al., 2007), which are modules that usually bind to phospholipid membranes in a  $\text{Ca}^{2+}$  -dependent manner (Rizo and Sudhof, 1998). While the tethering function of E-Syts lies on the putative hydrophobic hairpin inserted into the ER (Giordano et al., 2013; Perez-Sancho et al., 2015) and the C2 domains that bind to the PM (Yu et al., 2016), the SMP domain is involved in the specific binding and transport of lipids (Collado et al., 2019; Saheki et al., 2016; Schauder et al., 2014).

The crystal structure of a fragment comprising the SMP and the first and second C2 domains (C2A and C2B) of human E-Syt2 revealed that the protein dimerizes through the SMP domain forming an elongated structure that defines a long crevice loaded with lipids. In this structure, each C2A-C2B pair forms an independent rigid tandem that displays flexibility with respect to the SMP (Schauder et al., 2014). This data suggested a model in which the SMP dimer would shuttle lipids from the ER to the PM and the driving force for this movement would be the binding of  $\text{Ca}^{2+}$  to the C2 domains. However, different additional roles have been assigned to the C2 domains. Among them, the ability to sense cytosolic  $\text{Ca}^{2+}$  signals to trigger E-Syt binding to the membrane and the specific recognition of phosphatidylinositol-4,5-bisphosphate ( $\text{PI}(4,5)\text{P}_2$ )-rich membranes. In addition, a regulatory role in lipid transport has been proposed as it has been seen that they contribute to lipid extraction by inducing membrane curvature (Bian et al., 2018; Collado et al., 2019; Idevall-Hagren et al., 2015; Lee et al., 2019; Min et al., 2007; Perez-Sancho et al., 2015). Such complexity is encoded on the properties, number and relative position of the C2 domains, and this, in turn, varies among isoforms and organisms. For instance, human E-Syts display either three or five C2 domains (Min et al., 2007); yeast E-Syts, known as tricalbins (Tcbs), either four or five C2 domains (Creutz et al., 2004); and plant E-Syts (SYTs), two domains (Perez-Sancho et al., 2016).

It is intriguing how plant SYTs achieve the required regulation by using only two C2 domains, given the sophisticated mechanisms proposed for proteins with a higher

number of C2 domains. For instance, the five C2 domains of human E-Syt1 provide a regulatory mechanism in which the Ca<sup>2+</sup>-dependent membrane binding of the C2A and C2C domains releases the interactions of the C2A with the SMP domain that inhibits lipid transport and the C2C-C2E interaction that prevents the C2E from interacting with PI(4,5)P<sub>2</sub>-rich membranes (Bian et al., 2018; Idevall-Hagren et al., 2015). Moreover, the molecular function of Tcbs also involves several C2 domains because the C2AB tandem, together with the N-terminal hydrophobic segment, is required to generate peaks on the ER facing the PM to facilitate lipid transport while the others may display a PM-tethering function (Fernandez-Busnadiego et al., 2015). Altogether, these data suggest that the plant C2 domains may harbor more specialized and manifold functions than those observed for the E-Syts from other kingdoms. At the same time, SYTs provide a simpler model to study protein activation in response to molecular signals.

To investigate the molecular mechanism responsible for the function of SYTs and specifically the role of the C2 domains in their regulation, we performed structural, biochemical and computational studies on SYT1. Our data shows that the properties of the C2A domain provide the basis for the integration of different signals as it displays independent binding sites to interact with Ca<sup>2+</sup> and PIPs. We additionally show that SYT1 displays up to three hinge points that confer orientational freedom to the C2 domains and flexibility to the molecule that enables an intimate contact with the PM upon elicitation of the PIP and/or Ca<sup>2+</sup> signal occurs. We propose that this process may generate a tense molecular conformation that results in a shortening of the distance from the SMP domain to the PM to facilitate lipid extraction and loading to the protein.

## Results

### ***The structure of the C2A domain of SYT1***

To frame into a structural model the differential functions of the C2A domain of SYT1 with respect to those of other C2 domains of the E-Syts, we solved its crystal structure in complex with Ca<sup>2+</sup> (SYT1C2A, residues 253 to 397) (Figure 1, Table S1). Similar to other C2 domains, SYT1C2A folds as a four-stranded  $\beta$  sandwich with a Ca<sup>2+</sup>-binding site placed in a cavity formed by three loops connecting the two sheets (L1, L2 and L3) (Figure 1B). The structure of the domain resembles that of the C2A domain of E-Syt2 (E-Syt2C2A), which displays a 25,7% sequence identity and a root mean squared deviation of 1.37 Å for 115 C $\alpha$  atoms (Schauder et al., 2014; Xu et al., 2014). Main differences are found in the loop connecting  $\beta$ 6 and  $\beta$ 7, which is folded as an  $\alpha$ -helix in E-Syt2C2A and it is not present in SYT1C2A; in the loop connecting  $\beta$ 1 and  $\beta$ 2, which is unusually long in E-Syt1C2A (Xu et al., 2014); and in a long insertion of 12 amino acids connecting  $\beta$ 7 and  $\beta$ 8 (loop L4), which is characteristic of *Arabidopsis* SYT1, SYT2 and SYT3 (Figure 1C). This comparison is relevant to establish if the unique structural features of SYT1C2A domain are important for SYT1 function.

A similar SYT1C2A core structure is also found in E-Syt2C2B and E-Syt2C2C domains; however, whereas SYT1C2A, E-Syt2C2A and E-Syt2C2B display the topology of those C2 domains with the N and C termini opposite to the Ca<sup>2+</sup>-binding site (topology 2), E-Syt2C2C has both ends at the same side of the Ca<sup>2+</sup>-binding site (topology 1) (Figure S1). This molecular organization does not determine the biochemical properties of the individual C2 domains but it might account for the properties of the consecutive C2 domains forming SYT1.

### ***The mechanism of Ca<sup>2+</sup> mediated activation SYT1C2A***

Available biochemical data on SYT1 showed that, while C2B does not harbor any Ca<sup>2+</sup> binding site, the C2A domain displays Ca<sup>2+</sup>-dependent activity to bind small negatively charged phospholipids such as phosphatidyl serine (PS) (Perez-Sancho et al., 2015; Schapire et al., 2008). To understand the basis of such activity, we analyzed the Ca<sup>2+</sup>-binding properties and the structure of the Ca<sup>2+</sup>-dependent lipid binding site of SYT1C2A.

Our structural data shows that SYT1CA2 displays two calcium ions (Ca I and Ca II) which are coordinated by the side chains of Asp 276, Asp 282, Asp 332, Glu 334 and Glu 340 residues plus the carbonyl oxygen from Lys 275 and Trp 333 (Figure 2). In addition, two water molecules complete the coordination of Ca<sup>2+</sup>. Lipid binding to this site lies in the direct coordination of the phosphoryl group of lipids with the Ca<sup>2+</sup> ions by the replacement of these water molecules (Rizo and Sudhof, 1998). E-Syt2C2A site displays a similar structure, however, the site binds three Ca<sup>2+</sup> ions, with two of them at equivalent positions to those of SYT1C2A and the third not present in SYT1C2A bound to L3 (Figure 1B).

To quantify the Ca<sup>2+</sup>-binding properties of SYT1C2A in solution, we used isothermal titration calorimetry (ITC). Our data shows that the binding isotherm fits to the one-set-of-sites model in which SYT1C2A binds only one Ca<sup>2+</sup> ( $n = 0.226 \pm 0.003$ ) with a dissociation constant (Kd) of  $0.05 \pm 0.02 \mu\text{M}$  ( $\Delta H = -4.9 \text{ kcal} \cdot \text{mol}^{-1}$ ) (Figure 2B). Such nanomolar Ca<sup>2+</sup>-binding site may serve as a structural site stabilizing the C2A domain at resting Ca<sup>2+</sup> concentrations. We were unable to characterize the second Ca<sup>2+</sup> site using ITC, since no significant heat was measured upon titration of SYT1C2A at higher Ca<sup>2+</sup> concentrations (Figure 2B). Hence, to characterize the second site, we monitored Ca<sup>2+</sup>-binding using a label free thermal shift assay (nano Differential Scanning Fluorimetry, nanoDSF) using Tycho NT. 6 (NanoTemper Technologies). The intrinsic fluorescence of C2A at increased concentrations of free Ca<sup>2+</sup> were recorded at 330 nm and 350 nm while heating the sample from 35 to 95 °C. Using this technique, the variation of the ratio of fluorescence (350 nm/330 nm) versus the temperature reports on the stability of SYTC2A domain or on the formation of a complex with a ligand if a binding event occurs.

Accordingly, our data shows that there is an increase in the inflexion temperature ( $T_i$ ) between the folded and unfolded states with increasing  $\text{Ca}^{2+}$  concentration (Figure 2C).

This effect is measurable when moving from 30  $\mu\text{M}$  to 300  $\mu\text{M}$ , thus demonstrating a  $\text{Ca}^{2+}$ -binding event in this concentration range. In addition, the variation of the initial fluorescence emission ratio represents the blue-shift in wavelength that is produced as a result of the  $\text{Ca}^{2+}$  binding to the protein. Thus, we can estimate the  $K_d$  since the variation of the initial ratio with increasing ligand concentrations tends to follow typical saturation curves of Michaelis–Menten kinetics (Magnusson et al., 2019). Using this approach, we calculated a  $K_d$  of  $277 \pm 24 \mu\text{M}$ . No shift in intrinsic fluorescence was observed for a mutated SYT1C2A in which two of the canonical aspartate residues involved in  $\text{Ca}^{2+}$  binding were replaced by alanine (Asp276Ala, Asp282Ala; SYT1C2A-DADA). This shows that, the observed  $\text{Ca}^{2+}$ -binding activity is specifically mediated by the  $\text{Ca}^{2+}$ -binding site (Figure 2C). The  $K_d$  value for the second  $\text{Ca}^{2+}$  site is quite above those expected to be physiologically significant, as  $\text{Ca}^{2+}$  stimulation in plants should be in the  $\mu\text{M}$  range (McAinsh et al., 1990). However, the absence of phospholipids often dismisses the  $\text{Ca}^{2+}$ -binding affinity of C2 domains (Fernandez et al., 2001). As expected, the addition of  $\text{Ca}^{2+}$  to SYT1C2B induced no change in the intrinsic fluorescence of the protein (Figure S2).

We analyzed the structure of SYT1C2A to identify the role of  $\text{Ca}^{2+}$  ions in lipid binding. Our data shows that Ca II interacts with seven protein atoms whereas Ca I interacts with five (Figure 2A). This indicates that Ca II is more tightly bound to the C2 core structure and supports that site II plays a structural function whereas site I represents the lower affinity  $\text{Ca}^{2+}$ -binding site. This means that site I will be occupied depending on the physiological  $\text{Ca}^{2+}$  concentration to activate the protein and trigger  $\text{Ca}^{2+}$ -dependent SYT1C2A lipid binding.

Unexpectedly, we were able to solve the structure of SYT1C2A with one cadmium ion ( $\text{Cd}^{2+}$ ) at site II using different crystallization conditions (Figure 2A and table S1). This structure mimics that with one  $\text{Ca}^{2+}$  at the high-affinity binding site. Indeed, the analysis of oxygen,  $\text{Ca}^{2+}$  and  $\text{Cd}^{2+}$  complexes found in the Cambridge Structural Database (Groom et al., 2016) of chemical structures determined at high resolution reveals that the coordination numbers and geometries of  $\text{Ca}^{2+}$  and  $\text{Cd}^{2+}$  with oxygens are very similar (Figure S3). Interestingly, the comparative analysis of the structures of SYT1C2A in complex with  $\text{Ca}^{2+}$  and  $\text{Cd}^{2+}$  show that Glu 334 at L1 changes its conformation to replace a water molecule at site I, whereas the positively charged side chain of Lys 286 replaces the Ca I. In this conformation, SYT1C2A might be unable to bind membranes through this site as Ca II would be occluded to interact with the phosphate moiety of phospholipids. Thus, this data might provide the structural basis for  $\text{Ca}^{2+}$  mediated activation of the SYT1C2A to bind membranes.

### ***SYT1C2A binds inositol phosphates (IPs) in a Ca<sup>2+</sup>-independent manner***

It has been shown that a fragment including C2A and C2B domains (C2AB) of SYT1 is able to bind PIPs (Perez-Sancho et al., 2015); however, the PIP binding site has not been described yet. The molecular nature of this interaction remains unknown and whether or not it occurs through the C2A domain or the C2B is an open question. In human E-Syts, the interaction between PI(4,5)P<sub>2</sub> and some of the C2 domains occurs through a surface-exposed basic patch known as the polybasic site (Giordano et al., 2013; Idevall-Hagren et al., 2015). This binding site is independent of Ca<sup>2+</sup> and it is built by a number of aromatic and positively charged amino acid side chains placed in the concave side of the  $\beta$ -sandwich structure of the domain (Diaz et al., 2016; Guerrero-Valero et al., 2009; Guillen et al., 2013; Pemberton and Balla, 2018).

We analyzed the structure of SYT1C2A to explore whether the C2A domain displays a polybasic site to bind PIPs and found a wide-open basic cavity at  $\beta$ 3,  $\beta$ 2,  $\beta$ 5 and  $\beta$ 6 sheets that could accommodate large polar heads such as that of PI(4,5)P<sub>2</sub>. Moreover, the basic characteristic properties of  $\beta$ 2 and  $\beta$ 3 at this cavity are reinforced by the positively charged amino acids of loop L4 between  $\beta$ 7 and  $\beta$ 8 (Figure 3 and 1C).

To investigate whether the reported PIP binding to C2AB occurs at SYT1C2A or SYT1C2B and whether it is specifically mediated through the lipid polar head of 1,4,5-trisphosphate (IP<sub>3</sub>) or it is just an effect of the unspecific binding of SYT1 to a negatively charged bilayer, we investigated the binding of IP<sub>3</sub> to SYT1C2A and SYT1C2B using nanoDSF (Table 1). To discard any Ca<sup>2+</sup>-mediated binding, the experiments were performed in the presence of 20  $\mu$ M EGTA. Our data indicates that IP<sub>3</sub> binds to SYT1C2A and not to SYT1C2B because the addition of 58  $\mu$ M IP<sub>3</sub> to SYT1C2A increases the  $T_i$  by more than 5 degrees and no increment in  $T_i$  is observed when the ligand is added to SYT1C2B (Table 1).

To corroborate that the binding for IP<sub>3</sub> occurs at the polybasic site of SYT1C2A, we generated a Lys286Ala/Lys288Ala/Lys298Ala/Lys341Ala quadruple mutant protein (SYT1C2A-PolyB) (Figure 1C and Figure 3). These residues were chosen because they contribute to the basic character of the polybasic site and equivalent mutations in the C2 domain of PKC- $\alpha$  abolish lipid binding to this site (Ferrer-Orta et al., 2017). The negligible effect on the  $T_i$  of SYT1C2A-PolyB upon IP<sub>3</sub> addition shows that the ligand binds to the polybasic site (Table 1).

Next, we compared the effect of IP<sub>3</sub> on SYT1C2A stability with the effect of inositol, inositol 1,4-bisphosphate, inositol 1,3,4-trisphosphate, inositol 1,4,5,6-tetraphosphate and 3,4,5,6-tetraphosphate to evaluate the specificity of SYT1C2A for IPs. Our data show that the pocket is not specific for any of the phosphorylated inositol molecules tested



because all of them bind equally to SYT1C2A. In stark contrast, inositol did not produce an increase of the  $T_i$ , which clearly indicates the requirement of a phosphate moiety to bind SYT1C2A. None of the phosphorylated inositol molecules tested was able to bind SYT1C2A-PolyB. (Table 1)

Finally, we analyzed the charge distribution at the molecular surface of those C2 domains from E-Syts with known three-dimensional structures (Xu et al., 2014) (Figure 3). The analysis clearly shows that SYT1C2A and E-Syt2C2C, which have been reported to bind PI(4,5)P<sub>2</sub>, display similar surface properties at the polybasic site. Conversely, E-Syt2C2A and E-Syt2C2B, which are unable to bind them, do not display the site (Figure 3) (Bian et al., 2018; Giordano et al., 2013; Idevall-Hagren et al., 2015). Altogether, our data indicates that the polybasic site of SYT1C2A determines the PI(4,5)P<sub>2</sub>-binding properties of SYT1.

The comparison of the protein sequence of SYT1C2A with those from other C2 domains from plant SYTs whose structures are still unknown (Figure 1C) shows that the overall architecture of the polybasic site of the SYT1C2A domain should be preserved in other C2A of plant SYTs, as most of the basic residues of  $\beta$ 2 and  $\beta$ 3 and the insertion at L4 are conserved. Hence, in contrast to the E-Syts, the plant C2A domains are likely to play an active role, providing specificity to the interaction of SYTs with PIPs at the PM. Conversely, as expected from our biochemical data, SYT1C2B and its protein orthologs do not harbor the basic residues that confer PI(4,5)P<sub>2</sub>-binding activity.

### ***SYT1C2A binds phosphatidylserine (PS) and PI(4,5)P<sub>2</sub> to cooperatively bind model membranes***

Our structural and biochemical data support a model for SYT1C2A binding to membranes in which the protein binds to PS through the Ca<sup>2+</sup>-dependent lipid-binding site and to PI(4,5)P<sub>2</sub> through the polybasic site. In contrast, our results indicate that the reported membrane-binding property of SYT1C2B (Schapire et al., 2008) is constitutive as this protein fragment binds neither Ca<sup>2+</sup> nor IPs. To corroborate this data, we analyzed the membrane-binding properties of SYT1C2A and SYT1C2B fragments using lipid sedimentation assays. We monitored the ability of these fragments to bind liposomes composed of 75% phosphatidylcholine and 25% PS (PC/PS) or 65% PC, 25% PS and 10% PI(4,5)P<sub>2</sub> (PC/PS/PI). Our data corroborate previous findings (Schapire et al., 2009) and show that SYT1C2A binds PC/PS membranes in a Ca<sup>2+</sup>-dependent manner, as the amount of protein bound to liposomes decreases in the presence of EGTA and the SYTC2A-DADA mutant does not bind liposomes at all. In contrast, no change in the binding properties of SYT1C2A to PC/PS/PI-containing liposomes is observed in the presence of either Ca<sup>2+</sup> or EGTA, which is a strong indication that this interaction is mediated by the polybasic binding site. Indeed, we did not observe any binding activity

to PC/PS/PI liposomes when assaying the SYT1C2A-PolyB mutant in the presence of EGTA (Figure 4A).

Similar results were obtained using bio-layer interferometry (BLI) to monitor the lipid-binding properties of the C2 domains of SYT1 (Sultana and Lee, 2015). In this assay, we immobilized lipid monolayers composed of a mixture of 75% and 25% PS (PC/PS) or 65% PC 25% PS 10% PI(4,5)P<sub>2</sub> (PC/PS/PI) on a biosensor tip. As SYT1C2A or SYT1C2B binds to lipids, incident light directed through the biosensor shifts and creates a quantifiable interference pattern (Figure 4B). Monitoring protein interaction with the tip in real time provides kinetic data on molecular interactions that can be used to determine relative affinities. Our data confirm that SYT1C2A binds PC/PS membranes in a Ca<sup>2+</sup>-dependent manner as we observed a reduction in the amount of protein bound to the sensor tip in the presence of EGTA. The same effect by EGTA was observed when using PC/PS/PI monolayers, but this reduction was intensified when the experiments were performed using the SYT1C2A-PolyB mutant protein or in the presence of IP<sub>3</sub>. These results support the involvement of the polybasic site in protein SYT1C2A interaction with the PC/PS/PI monolayer as IP<sub>3</sub> would compete with PI(4,5)P<sub>2</sub> for the polybasic binding site.

Our data also confirms that SYT1C2B binds model membranes (Figure 4A and 4B). Interestingly, the BLI experiments showed that the protein remains anchored to the biosensor tip during the dissociation step (Figure 4D) thus, supporting that SYT1C2B display a constitutive membrane-binding mode.

### ***The structure of SYT1C2A in complex with PS and IP<sub>3</sub>***

We modeled the complexes of SYT1C2A with PS and with PI(4,5)P<sub>2</sub> to unravel the structural basis of the domains' lipid specificity. To build these structures, we took advantage of our biochemical data and the structural knowledge about this interaction with other C2 domains. Among them, the complex between dicaproylphosphatidylserine (DCPS) and the C2 domain PKC at the Ca<sup>2+</sup>-dependent lipid binding site (Verdaguer et al., 1999) and the complexes between inositol phospholipids and PKC (Guerrero-Valero et al., 2009) or Rabphilin (Ferrer-Orta et al., 2017; Guillen et al., 2013) at the polybasic site. Hence, we superimposed those structures to that of SYT1C2A to identify the lipid-binding sites and modeled DCPS and IP<sub>3</sub> in complex with SYT1C2A using the GOLD software (Jones et al., 1997). We included as an additional binding site the basic patch located in the vicinity of L4 (Figure 3) as it displays the size and electrostatic potential that are necessary to accommodate an IP<sub>3</sub> molecule. The protein was treated as rigid and full flexibility was allowed for the ligands. We selected meaningful interactions from visual inspection of the top-scoring ligand solutions using molecular graphics.

The lipid specificity of the  $\text{Ca}^{2+}$ -dependent lipid-binding site is restricted by the conformation of the L1, L2 and L3 loops (Verdaguer et al., 1999). Thus, the narrow cavity defined in SYTC2A at this site may explain the  $\text{Ca}^{2+}$ -dependent selectivity for a lipid with a small polar head such as PS (Schapire et al., 2009). Accordingly, the DCPS molecule docks into the  $\text{Ca}^{2+}$ -dependent lipid-binding site making several favorable interactions (Figure 5A). The model shows that the phosphoryl group coordinates Ca I, while the hydrophobic moiety of DCPS interacts with Leu 277 and Val 336 at the solvent-exposed tips of L1 and L3. Conversely, the lipid polar head points towards L2 where the presence of the positively charged Lys 304 at the entrance of the cavity may hinder the interaction of SYT1C2A with positively charged lipid polar heads.

As expected, the  $\text{IP}_3$  molecule docks into the polybasic site of SYT1C2A and establishes favorable electrostatic interactions with the  $\text{PO}_4^{2-}$  moieties. In addition, aromatic Phe 284 and Tyr 331 interact with the hydrophobic face of the inositol ring. However, the molecule does not bind at a unique defined site; rather, it is predicted to bind at different places that have in common the position of the phosphate moieties of  $\text{IP}_3$ . These groups are inserted into a small positively charged pocket defined by a network of Lys and Arg residues placed regularly on the concave side of SYT1C2A (Figure 5B). In accordance with our biochemical data, this network would not restrict the interaction to any specific phosphorylated inositol and presages an efficient interaction with them.

### ***The topology of SYT1C2A membrane association depends on $\text{Ca}^{2+}$ and $\text{PI}(4,5)\text{P}_2$***

The topology and orientation of the C2 domains with respect to the membrane and the membrane penetration are determined by the restrictions imposed by the binding to the  $\text{Ca}^{2+}$ -dependent or to the polybasic lipid binding sites. Different experimental and computational approaches to this issue have led to the conclusion that the C2 domains may associate with membranes in at least two possible manners (Ausili et al., 2011; Cho and Stahelin, 2006; Honigmann et al., 2013; Prasad and Zhou, 2020): in the first conformation, the domain is oriented perpendicularly to the plane of the membrane, with the  $\text{Ca}^{2+}$ -binding site interacting with the polar heads of the membrane lipids; and in the second, the C2 domain is oriented parallel to the membrane, with both the  $\text{Ca}^{2+}$ -binding site and the polybasic site interacting with the membrane.

To elucidate how SYT1C2A associates to the membrane and to provide mechanistic understanding of this interaction, we performed unrestrained molecular dynamics (MD) simulations of a  $\text{Ca}^{2+}$ -bound SYT1C2A molecule attached to a model membrane containing either solely PS and sitosterol (PS-M) in both monolayers or a randomly distributed mixture of PS, sitosterol, and  $\text{PI}(4,5)\text{P}_2$  in the lower leaflet (PSPIP-M, see Methods). Both simulations revealed a stable association of SYT1C2A (over a period of 485 ns) with the inner leaflet that was driven by distinct interactions of the two bound  $\text{Ca}^{2+}$  ions with the PS head groups (Figure 5C, Supplementary Movie 1). Remarkably, the

incorporation of PI(4,5)P<sub>2</sub> to the inner leaflet translated into an induced tilt of the domain that led SYT1C2A to adopt a more parallel arrangement with respect to the plane of the membrane (Figure 5C, Supplementary Movie 1). This tilt was triggered by the progressively tighter electrostatic interactions between the polybasic binding site of SYT1C2A and the PI(4,5)P<sub>2</sub> head groups. From both simulation results, we conclude that both conformations are feasible and dependent on the presence of PI(4,5)P<sub>2</sub> in the inner leaflet of the membrane.

The analysis of the perpendicular conformation of SYT1C2A bound to the PS-M reveals that the Ca<sup>2+</sup>-dependent association encompasses the insertion of the hydrophobic tip of loops L1 (Leu 277 and Met 278) and L3 (Val 336) and direct hydrogen bond formation between most polar residues in these loops with the polar heads of ~14 PS molecules. A similar pattern of interactions in the vicinity of the Ca<sup>2+</sup>-dependent binding site is observed for the parallel orientation of SYT1C2A bound to PSPIP-M. However, loops L1 and L3 penetrate deeper into the membrane and there is an increased number of direct hydrogen bonds between SYT1C2A residues and the lipids, of which ~8 are PS and ~10 are PI(4,5)P<sub>2</sub>. Of particular interest are the interactions observed between the hydrophobic face of the phosphoinositol heads of lipids at the polybasic site, as they interact with Phe 284 and Tyr 331 (Figure 5B and Figure S4) in a fashion similar to that observed for the interaction between phosphoinositides and the C2 domain of PKC (Guerrero-Valero et al., 2009). These observations provide molecular insight into the enhanced affinity and specificity of SYT1C2A for PI(4,5)P<sub>2</sub>-containing membranes (Figure 4).

Next, we performed MD simulations on the SYT1C2B fragment attached to a PSPIP-M model membrane to investigate the basis of its membrane binding properties. The simulation revealed a stable association with the membrane that is governed by the insertion of the hydrophobic tip of loop L3 among the hydrocarbon tails of the phospholipids. The SYT1C2B domain displays up to 9 direct hydrogen bonds to PI(4,5)P<sub>2</sub> molecules. However, these interactions with the lipid polar heads do not involve the inositol ring; rather they are charge-based interactions, solely mediated through the PO<sub>4</sub><sup>2-</sup> moieties (Figure 5D).

Finally, we investigated if the pattern of interactions of each individual C2 domain with the PSPIP-M model membrane is conserved when the MD simulations are performed using the V-shaped conformation of C2AB observed in the crystal structure of E-Syt2 (Schauder et al., 2014; Xu et al., 2014). Our calculations showed that the hydrophobic tips of Ca<sup>2+</sup>-dependent lipid-binding site for SYT1C2A and loop L3 of SYT1C2 are inserted into the membrane. Remarkably, the latter is structured into a well-defined  $\beta$ -hairpin whereas the residues making up the polybasic site of SYT2A interact with the polar heads of several PI(4,5)P<sub>2</sub> molecules (Figure 5E and Figure S4). This putative binding

mode suggests the feasibility of a stable and lasting interaction of the C2AB tandem with the membrane that depends on  $\text{Ca}^{2+}$  and  $\text{PI}(4,5)\text{P}_2$  molecular signals.

### ***SYT1 connects ER and PM through three flexible hinge points***

The crystal structure of a E-Syt2 fragment comprising the SMP and the two adjacent C2 domains (C2A and C2B) revealed a modular structure in which the SMP domain dimerizes to form an elongated cylinder of around 90 Å and two rigid tandems formed by independently arranged C2A and C2B domains that are linked to the SMP through a flexible linker (Schauder et al., 2014). The sequence analysis of the SMP and both C2A and C2B domains of SYT1 reveals that they are structurally similar to those of E-Syt2. However, the relative position between the domains cannot be accurately predicted as the aminoacidic sequence linking any two of them are not conserved (Phyre2 server (Kelley et al., 2015)). This arrangement and the flexibility of the amino acid stretch connecting the SMP to the C2AB domains is likely to be related to SYT1 function as it restricts the relative orientation of these domains with respect to the ER and plasma membranes. Consequently, the knowledge derived from the study of the molecular organization of SYT1 will provide information on the molecular function of the protein.

To investigate whether the domain organization observed for E-Syt2 is conserved in SYT1, we analyzed two different overlapping fragments of the SYT1 structure: the SMPC2A, from residue 34 to residue 397, and the C2AB, from residue 253 to the C-terminus (Figure 1A) using SAXS. This powerful technique yields structural information of both ordered and disordered biological macromolecules at low resolution, including their size and shape in solution as well as their flexibility (Hura et al., 2009).

Analysis of the one-dimensional SAXS experimental curves was initially performed to judge the quality of the data and to obtain basic structural information of the proteins under study (Figure S5). The data indicated that the SMPC2A fragment displays a molecular mass of 73 KDa, a radius of gyration ( $R_g$ ) of 44.9 Å and a maximum size ( $D_{\text{max}}$ ) of 176 Å. These values are in accordance with the reported dimeric structure of the SMP domain of E-Syt2 (Schauder et al., 2014) (Material and methods section, Table S2).

Protein flexibility in solution can be experimentally qualitatively estimated by Kratky plot and quantitatively by means of the Porod exponent analysis. This last parameter ranges from 2 to 4 for flexible and compact proteins, respectively (Feign and Svergun, 1987; Rambo and Tainer, 2011). The estimated Porod exponent 2.8 for SMPC2A denotes that the molecule is compact but displays some degree of flexibility. This suggests that the relative position of the two C2A domains with respect to the dimeric SMP domain is variable. To investigate this issue in detail we employed a SAXS-based pseudo atomic modeling approach using the MultiFoXS server (Schneidman-Duhovny et al., 2016). This technique can be used for the structural characterization of flexible proteins in solution

if a high-resolution structure or a comparative model of the studied protein is available. The procedure consists in a low-resolution rigid-body fitting to the experimental data that includes flexibility between the folded domains that make up the structure. This is performed by sampling random conformations along flexible residues and considering that an ensemble of multiple conformations contributes to a single observed SAXS profile. Thus, to build a model of the protein in solution we used the high-resolution atomic structure of SYT1C2A and a model based on the atomic structure of the SMP domain from E-Syt2 (Kelley et al., 2015). In addition, we model-built residues N34 to K67 and the linker between the SMP and C2A domain that were not present in the initial model (Materials and methods). The server sampled over 10,000 conformations, calculated their SAXS profiles and scored multi-state models according to their fitting to the experimental profile. The output reveals that the fitting of a two-state model leads to a significant improvement relative to the model based on the X-ray structure (Figure S2). The analysis of this manifold conformational model confirms that the linker between SMP and C2A is indeed a flexible hinge point (Figure 6A and 6B). In addition, the N-terminal extension of SMPC2A that links the hydrophobic segment inserted into the ER membrane to the SMP domain (residues from N34 to K67) (Figure 6A) remains unstructured and is likely to represent an additional hinge point in the molecule. Finally, the low-resolution structure shows a symmetric and extended arrangement of C2A domains with respect to the SMP domain that differs from the compact conformation observed in the crystal structure of human E-Syt2.

The SAXS data corresponding to the C2AB fragment indicates a molecular mass of 31 kDa, an  $R_g$  of 31.3 Å and a maximum size of 121 Å. These parameters are in accordance with a monomeric and elongated structure for the C2AB domain (Table S2, Figure S2). The Porod exponent for this fragment is 2.1, indicating that the molecule is highly flexible. However, the shaped features displayed by the pair distribution function at long distances (Figure S5) indicate that the fragment may adopt several distinct conformations. To analyze the SAXS data of this construct, we employed the same approach used for the SMPC2A fragment, using as a template the high-resolution atomic structure of the human C2A-C2B fragment (Xu et al., 2014) and defining a hinge point at the linker between the C2 domains. The resulting model includes two independent and largely different conformations that together fit to the experimental data (Figure 6C and Figure S6). Interestingly, while one of those conformers displays a V-shaped compact structure that resembles that observed in the crystal structure of E-Syt2 (Schauder et al., 2014; Xu et al., 2014), and simulated bound to a membrane model as described above, the other shows an extended conformation in which there is no interaction between C2A and C2B domains (Figure 6D). The analysis of the superposition of these low-resolution models confirms the presence of an additional hinge point at the linker between C2A and C2B that contrasts with the crystallographic data on E-Syt2, in which the C2A and C2B domains are arranged as a rigid tandem that is not altered by the

presence of the SMP domain or  $\text{Ca}^{2+}$  ions (Schauder et al., 2014; Xu et al., 2014). Interestingly, our analysis of the data obtained from the SAXS experiments performed in the presence of either 1 mM  $\text{Ca}^{2+}$  or 1 mM EGTA did not reveal any significant differences (Figure S5).

## Discussion

### ***The C2A domain of SYT1 regulates protein function***

The molecular mechanisms controlling the membrane tethering and lipid transport activities of E-Syts are tightly regulated by the accumulation of  $\text{PI}(4,5)\text{P}_2$  at the membrane and by the elevation of cytosolic  $\text{Ca}^{2+}$  concentration (Bian et al., 2018; Giordano et al., 2013; Idevall-Hagren et al., 2015; Lee et al., 2019; Saheki et al., 2016; Yu et al., 2016). This regulation, in turn, is encoded in a complex system of domain-domain and domain-membrane interactions in which the different properties of the multiple C2 domains comprised in the E-Syts structure play a central role. This diversity is encompassed in the two C2 domains of plant SYTs. *In vivo* studies showed that SYT1 is anchored to the ER through an N-terminal hydrophobic region and binds to the PM through the two C2 domains at the C-terminal end (Perez-Sancho et al., 2015). It has also been shown that, whereas the C2A domain displays  $\text{Ca}^{2+}$ -dependent activity to bind model membranes, the C2B domains display constitutive membrane-binding properties (Schapire et al., 2008). These data suggest that C2B is likely to play a passive role for the tethering activity of SYT1 while C2A may additionally regulate the lipid transport activity. To investigate the membrane-binding properties of SYT1C2A, we have determined its 3D structure and analyzed its  $\text{Ca}^{2+}$ - and lipid-binding properties.

Our structural data shows that SYT1C2A displays a  $\text{Ca}^{2+}$ -binding site with high affinity which, even at resting  $\text{Ca}^{2+}$  concentrations, is occupied and inaccessible to solvent, and another, which functions as a relay for sensing physiological  $\text{Ca}^{2+}$  variations and triggers the  $\text{Ca}^{2+}$ -dependent binding to lipids (Figure 2). Similar  $\text{Ca}^{2+}$ -binding properties have been reported for the C2A domain of human E-Syt2 (Xu et al., 2014), as well as for other C2 domains such as human synaptotagmin (Fernandez-Chacon et al., 2002), disferlyin (Fuson et al., 2014), or for the *Arabidopsis* CAR proteins (Diaz et al., 2016). Thus, it is likely that this mechanism is shared by all of these C2 domains.

In plants, CS expansion mediated by SYTs in response to stress requires two events, namely, the activation of  $\text{Ca}^{2+}$  signaling and the accumulation of PIP at the PM. However, the dynamics of such a process is consistent with the slow accumulation of PIP rather than with the fast increase of  $\text{Ca}^{2+}$  concentration (Lee et al., 2020) (Lee et al., 2019). Our structural and biochemical data show that SYT1C2A provides a framework to reconcile these observations. We have shown that the domain displays a dual activity to bind PS or PIPs in a  $\text{Ca}^{2+}$ -dependent or independent manner, respectively. These interactions

cooperate to enhance the SYT1C2A affinity for membranes (Figure 4) as they occur at different sites: a polybasic site to accommodate PIP interaction and a  $\text{Ca}^{2+}$ -dependent lipid binding site to bind PS (Figures 3 and 5). Together, these data imply that the  $\text{Ca}^{2+}$ -dependent interaction with PM of SYT1C2A occurs first and thereafter PIP triggers CS expansion. In contrast, our data further supports the available evidence related to the non-regulated tethering function of SYT1C2B (Schapire et al., 2008), as we have confirmed that SYT1C2B binds model membranes and have found that the protein does not bind  $\text{Ca}^{2+}$  nor  $\text{IP}_3$  (Figure S2 and Table 1).

Interestingly, we have shown that SYT1C2A binds  $\text{IP}_3$  as well as other phosphorylated inositol derivatives (Table 1). These interactions might compete with those involving PIPs in living cells. For instance, the protein kinase PDK1 interacts with  $\text{Ins}(1,3,4,5,6)\text{P}_5$  and  $\text{Ins}(1,2,3,4,5,6)\text{P}_6$  to prevent PIP-mediated interaction to membranes and to anchor the protein in the cytosol (Komander et al., 2004). An increase in  $\text{IP}_3$  levels may result from the hydrolysis of the PIPs to produce diacyl glycerol (DAG) due to the activation of the phospholipase C activation in response to stress (Bian et al., 2018; Saheki et al., 2016). Moreover, it has been proposed that the role of SYT1 and SYT3 in plants—and E-Syts in mammals—is to transfer DAG from the PM to the ER to maintain membrane stability (Ruiz-Lopez et al., 2020; Saheki et al., 2016). Thus, our data provide insights for the regulation of SYTs in response to  $\text{IP}_3$  and DAG production at membrane CS.

### ***The molecular flexibility of SYT1 is central to developing tether and lipid transfer functions***

In *Arabidopsis*, abiotic stress produces PM instability by the accumulation of DAG. SYT1 and SYT3 act as ER-PM molecular tethers that participate in the restoration of PM homeostasis by transporting DAG to the ER (Lee et al., 2019; Ruiz-Lopez et al., 2020). Despite this knowledge, the molecular mechanism by which SYTs associates with PM to extract and transfer DAG is unclear. The available structural and biochemical data suggest that the SMP dimer (i) is tethered to the ER through the N-terminal hydrophobic segment and to the PM through the C2 domains and (ii) shuttles lipids from one membrane to another (Saheki and De Camilli, 2017a, b; Wang et al., 2017; Wong et al., 2018) (Figure 7).

The lipid transfer activity of E-Syts necessarily requires conformational changes that enable the loading of lipids to the SMP domain from the PM and their delivery to the ER or vice versa. Moreover, protein-membrane interactions and the alteration of local lipid composition triggered by stress imply changes in the membrane that the protein should accommodate. The structure of SYT1 at low resolution revealed three flexible hinges within the protein (Figure 6). Our SAXS data shows that this feature enables SYT1 to undergo conformational changes that involve increases in the calculated  $R_g$  of 34% for the C2AB fragment (2.3 to 3.5 nm) and 8% for the SMPC2A fragment (3.8 to 4.1 nm)



([Figure 6 and Table S2](#)). This capacity provides a high degree of conformational freedom that facilitates macromolecular motions to adapt to the changing composition of PM in response to stress and to trigger lipid transport.

The lipid-binding properties of the C2 domains of SYT1 suggest that SYT1C2A might provide the driving force for the functional reorganization of the protein at membrane CS. In the resting state, at low  $\text{Ca}^{2+}$  concentrations, SYT1 displays a broad localization in the ER although it is enriched at CS (Perez-Sancho et al., 2015). In this situation, SYT1C2B may be tethering ER and PM while SYT1C2A could be detached from the PM ([Figure 6](#), step 1). The  $\text{Ca}^{2+}$ -dependent interaction of the SYT1C2A domain with the PM will promote the reported fast CS expansion by the enhancement of the tethering function of SYT1 (Perez-Sancho et al., 2015) (Lee et al., 2019). The SAXS data showed that the maximum molecular dimension of the SMPC2A fragment does not differ much from the ER and PM distance in yeast CS (Collado et al., 2019) (17 nm and  $23 \pm 5$  nm, respectively). Indeed, it has been shown that overexpression of *Syt1* induces a decrease of  $\sim 7$  nm in the CS intermembrane distance (Fernandez-Busnadiego et al., 2015). Hence, it is plausible that SYT1 tethers both membranes if the protein displays an extended conformation with its long axis perpendicular to the membrane, as shown here by MD simulations in the presence of  $\text{Ca}^{2+}$  ([Figure 5](#)). In addition, this molecular expansion might reshape the SYT1C2A interface with the SMP domain, so as to enable lipid loading ([Figure 6 and Figure 7 step 2](#)).

Further conformational changes are expected in SYT1 because the binding of SYT1C2A to PIPs is coupled to a change in the relative position of SYT1C2A with respect to the plane of the membrane, that is, from a perpendicular to a parallel orientation, due to the geometrical restraints imposed by the occupation of the polybasic lipid-binding site ([Figure 5](#)). This transition is likely to be coupled to the approach of the SMP domain to the PM for lipid loading because the lipid-binding sites and the N-terminal linker to the SMP are located on opposite sides of the C2 domain ([Figure 7 step 3](#)).

Finally, the variable organization of C2A with respect to the C2B domain contrasts with the rigid architecture of the C2AB tandem of human E-Syt2 and better resembles that observed for the C2A and C2B domains of synaptotagmin ([Figure 6](#)). The latter enables the simultaneous and strong binding of C2A and C2B to the membrane and provides functional versatility to bridge vesicles and PM prior to membrane fusion (Prasad and Zhou, 2020). Similarly, one may consider the possibility that SYT1C2AB could be anchored to the PM for lipid loading or could be bridging ER and PM for lipid release to the ER. Indeed, C2A binding to the ER membrane should also be considered as it contains phospholipids with a net negative charge such as PS (Fouillen et al., 2018), this may represent the endpoint of a model in which DAG could be delivered to the ER ([Figure 7 step 4](#)).

### ***SYT1 induce membrane instability to favor lipid transfer***

The asymmetrical insertion of a protein fragment into one leaflet of the lipid bilayer induces local membrane destabilization and generates curvature (McMahon and Boucrot, 2015; McMahon et al., 2010). As a consequence, the energy barrier required for lipid extraction or insertion from or to the bilayer is reduced (Collado et al., 2019). Indeed, the insertion of the N-terminal hydrophobic end of Tcbs induces the formation of peaks of strong curvature at the ER region facing the PM. These structures shorten the ER-PM distance by ~7 nm and facilitate lipid transport (Collado et al., 2019). The N-terminal hydrophobic end of human E-Syts and Tcbs are folded as helical hairpins inserted into one leaflet of the ER membrane (Giordano et al., 2013; Saheki and De Camilli, 2017b). Comparison of the hydrophobic segments of these proteins and those of plant SYTs shows that they are longer than single transmembrane helices of proteins inserted into the ER membrane (34 and 35 amino acids for SYT1 and SYT3, respectively, and 20 amino acids for a transmembrane helix (Sharpe et al., 2010) (Figure S7). In addition, the HHpred server (Zimmermann et al., 2018) predicts a remote homology with the structure of a membrane hairpin of two helices facing the N- and C-termini to the cytosol (Howell et al., 2005). In this structure, a conserved pattern of Gly residues, which is also observed in SYTs, facilitates the packing of the helices making up the hairpin and the formation of the loop connecting them. Thus, it is likely that SYTs are also anchored to the ER membrane by a hairpin that plays an active role in SYT1 function by reducing the ER-PM distance and facilitating lipid transfer, as observed in Tcbs.

The Ca<sup>2+</sup>-dependent shallow membrane insertion of the loops making up the Ca<sup>2+</sup>-dependent lipid-binding site at the level of the glycerol backbones of the phospholipids induces membrane instability (McMahon and Boucrot, 2015). Our MD simulations show that membrane binding of SYT1C2A involves the insertion of the L1 and L3 tips to this level; moreover, this insertion is more pronounced when the domain is orientated in a parallel conformation and the SYT1C2B is also considered (Figure 5C and 5E) and distorts membrane structure (Figure 5 and Figure S4). This data suggests that the regulated binding of the SYT1C2A contributes to membrane destabilization and promotes lipid extraction. Since the aligned protein sequences of those C2 domains that display a Ca<sup>2+</sup>-binding signature conserve the hydrophobic residues at the tips of loops L1 and L3 it is reasonable to assume that they all share a similar insertion mode (Figure 1C).

The differences in size and shape of the lipids making up the inner and outer monolayers are a source of membrane instability. The accumulation of lipids endowed with bulky headgroups, such as PI(4,5)P<sub>2</sub>, favors positive curvature as they act as wedges. Conversely, DAG imposes negative curvature as it has no polar head (Di Paolo and De Camilli, 2006). E-Syts are regulated by the accumulation of PIPs in the PM and their function is to clear away the DAG formed by the action of phospholipase C (Ruiz-Lopez

et al., 2020; Saheki et al., 2016). This suggests that the clearance of DAG, by itself, may act as a regulator of protein function as this process will contribute to membrane stabilization and hinder lipid extraction.

Taking all of our results together, we propose a model by which the flexible SYT1 molecule integrates PIP and Ca<sup>2+</sup> signals elicited by stress through the robust interaction of the SYT1C2A domain with the PM. This process may generate membrane instability and/or tense conformations that could favor lipid transport from the PM to the ER. These findings represent a substantial progress towards elucidating the basis for plant adaptation to stress and may have biotechnological implications. In addition, our data provide insight into a fundamental process common to all eukaryotic cells. Human E-Syts, yeast tricalbins and plant SYT1 share both molecular structure and function and, thus, it is likely that they also conserve the molecular basis of their membrane-delimited regulatory mechanisms.

## Materials and Methods

### Protein Expression and Purification

The pGEX6P1:SYT1C2AB (residues K253-Cterm), pGEX6P1:SYT1C2A (residues K253-E397), pGEX6P1:SYT1C2A-DADA (D276 and D282 into A), pGEX6P1:SYT1C2A-PolyB site mutant (K286, K288, K298 and K341 into A), pGEX6P1:SYT1C2B (residues G374-end) and pGEX6P1:SYT1-SMPC2A (residues N34-E397) were transformed into Rosetta 2 (DE3) pLysS cells (Stratagene) for protein expression using standard protocols. The same protocol of expression was used for the three proteins. A total of 48 mL of a 6 hour culture was subcultured into 6 L of fresh 2TY broth (16 g Bacto tryptone, 10 g yeast extract, 5 g NaCl/L of solution) plus ampicillin (100 ug/mL) and chloramphenicol (35 ug/mL) at 37 ° C. When the OD at 600 nm was 0.9, the overnight protein expression was induced with 0.3 mM isopropyl-β-d-thiogalactoside at 16°C. Cells were harvested by centrifugation (30 min, 4,750 rpms in a SX4750 Beckman Coulter swinging bucket rotor) at 4° C and all further handling of sample was done at this temperature. Pellets were resuspended in their respective lysis buffers (see below). Resuspended cells were disrupted by sonication. After centrifugation (30 min, 40,000 x g), the clear supernatant was filtered (0.45 μm; Millipore Corporation). The filtered supernatant was mixed with 2 mL slurry of previously washed and equilibrated Glutathione Sepharose 4B beads (GenScript). After incubation, beads were washed with 100 volumes of their respective wash buffer (see below). SMPC2A GST-tagged protein had an additional step, where beads were washed with 135ml of wash buffer 2 (see below). An overnight cleavage of the GST-tag of all constructs was performed by addition of Precision protease to the bead solution. The post-cleavage proteins were eluted with their respective wash buffers. GST-tagged SYT1C2B which was eluted with wash buffer plus 20 mM reduced Glutathione and was not cleaved. A final purification step was performed by using a

HiLoad 16/60 Superdex 200 preparative grade column (GE Healthcare) equilibrated in their respective Gel Filtration buffer (see below). The size and purity of the recombinant proteins was verified by SDS/PAGE. SYT1C2A, C2AB and SMPC2A purified proteins were concentrated to 10 mg/mL for protein crystallization and SASX trials, and were stored at -80° C.

C2AB lysis buffer had 50 mM Tris-HCl pH 8.0, 500 mM NaCl, 10 mM Ethylenediaminetetraacetic acid (EDTA) and 2 mM dithiothreitol (DTT), 0.01 mg/mL DNase, 0.1 mM phenylmethylsulfonyl fluoride (PMSF) and 0.5x of EDTA-free Protease Inhibitor Cocktail (cOmplete, Roche). Wash buffer had 50 mM Tris-HCl pH 8.0, 500 mM NaCl and 2 mM DTT. Gel Filtration (GF) buffer had 20 mM Tris-HCl pH 8.0 and 50 mM NaCl.

SYT1C2A and SYT1C2A-PolyB lysis buffer had 50 mM Tris-HCl pH 8.0, 500 mM NaCl, 1 mM CaCl<sub>2</sub>, 2 mM DTT, 0.01 mg/mL DNase and 0.1 mM PMSF. Wash buffer had 50 mM Tris-HCl pH 8.0, 500 mM NaCl, 1 mM CaCl<sub>2</sub>, 2 mM DTT. GF buffer had 50 mM Tris-HCl pH 8.0, 50 mM NaCl and 1 mM CaCl<sub>2</sub>. For GST-tagged SYT1C2B and SYT1C2A-DADA the buffers used were the same without CaCl<sub>2</sub>.

SMPC2A lysis buffer had 20 mM Tris-HCl pH 8.0, 250 mM NaCl, 5% glycerol, 10 mM EDTA, 0.2% Triton X-100, 2 mM DTT, 0.01 mg/mL DNase, 0.1 mM PMSF and 0.5x of EDTA-free Protease Inhibitor Cocktail (cOmplete, Roche). Wash 1 buffer had 20 mM Tris-HCl pH 8.0, 250 mM NaCl, 5% glycerol, 10 mM EDTA, 0.2% Triton X-100, 2 mM DTT. Wash 2 buffer and GF buffer were the same and had 20 mM Tris-HCl pH 8.0, 100 mM NaCl, 5% glycerol and 2 mM DTT.

### **Crystallization, Data Collection, Structure Solution and Refinement**

C2A with 1 mM CaCl<sub>2</sub> from purification buffer was concentrated to 10 mg/mL. Rhomboidal crystals appeared in two crystallization conditions one containing 20 % w/v polyethylene glycol 6,000, 100 mM TRIS pH 8.0 and 10 mM zinc chloride and another one containing 12% w/v Polyethylene glycol 3,350, 100 mM HEPES pH 7.5, 5 mM cobalt (II) chloride hexahydrate, 5 mM nickel (II) chloride hexahydrate, 5 mM cadmium chloride hydrate and 5 mM magnesium chloride hexahydrate. Crystals appeared in 2-7 days. Crystals were cryoprotected in the crystallization solution containing 25% w/v ethylene glycol, mounted in fiber loops and flash-cooled in liquid nitrogen. X-ray diffraction data were collected at the BL13-Xaloc, ALBA synchrotron using a Dectris Pilatus 6M detector. Diffraction data were processed and scaled using XDS (Kabsch, 2010). AIMLESS from the CCP4 package (Collaborative Computational Project, Number 4, 1994) was used to merge the data (Winn et al., 2011). A summary of the data collection statistics is given in [Table S1](#). The X-ray structures of C2A in complex with Ca<sup>2+</sup> and Cd<sup>2+</sup> were solved by molecular replacement with the program Phaser (Adams et al., 2010) using the coordinates of the C2A domain of Synaptotagmin-7 [Protein Data Bank (PDB) ID code

6ANK]. Successive cycles of automatic refinement and manual building were carried out with Phenix Refine (Adams et al., 2010) and Coot (Emsley and Cowtan, 2004). Model stereochemistry was verified with MolProbity (Zhang et al., 2010). The protein cartoon figures were obtained using PyMOL (DeLano, 2002). The refinement statistics are summarized in [Table S1](#).

### Small Angle X-ray Scattering (SAXS)

SAXS data were collected in the bioSAXS beamline B21, at Diamond Light Source, Harwell, United Kingdom (Cowieson et al., 2020). For the SYT1C2AB and SYT1SMPC2A 45  $\mu\text{l}$  for each with a concentration of 10 and 6.6  $\text{mg mL}^{-1}$  respectively, were injected onto a Superdex 200 increase 3.2/300 column at 20°C using 50 mM Tris pH 8 50mM NaCl and 20 mM Tris pH 8, 100 mM NaCl, 5% glycerol, 2 mM DTT respectively, as the running buffer. The output flow from the Agilent HPLC was directed through a 1.6 mm diameter quartz capillary cell held in vacuum. The flow rate was set to 0.08  $\text{mL min}^{-1}$  and 620 frames (with an exposure time of 3 s) were collected using a PILATUS 2M (Dectris, Switzerland) detector at the distance of 3.7 m and 4.014 m from SYT1C2AB and SYT1SMPC2A samples, respectively. Collected two-dimensional images were corrected for variations in beam current, normalized for exposure time and processed into one-dimensional scattering curves using GDA and the DAWN software (Diamond Light Source, UK). The background was manually subtracted using the program ScÅtter (<http://www.biosis.net/scatter>). SAXS data collection and experimental parameters are summarized in [Table S2](#).

Analysis of the one-dimensional SAXS experimental curves was initially performed to judge the quality of the data and obtain basic structural information related to the size and shape of the studied proteins (Figure S4 and Table S2). One such structural parameter is the radius of gyration ( $R_g$ ) calculated from the slope of the Guinier plot described as  $\ln(Iq)$  vs  $q^2$ , where  $q = 4\pi\sin(\theta)/\lambda$  is the scattering vector ( $2\theta$  is the scattering angle and  $\lambda$  is the wavelength) (Guinier, 1939). For globular proteins, this plot is expected to be linear at low  $q$ , corresponding to values of  $q \cdot R_g < 1.3$  in the Guinier zone of  $0 - 1/R_g$ . Linearity of the Guinier plot is considered a quality measurement of the data but does not ensure ideality of the sample. SAXS curve analysis also provides an estimate on the molecular mass of a protein that in turn relates to its oligomeric state. The molecular mass of a protein approximately corresponds to half of its Porod volume (excluded volume of the hydrated protein particle). Porod analysis reflects the behavior of the scattering intensity at higher  $q$  range (Porod plot). Finally, the maximum size of a protein ( $D_{max}$ ) can be obtained from analysis of the SAXS data by means of the Pair-Distance Distribution Function [ $P(r)$ ], which corresponds to the distribution of distances between all the electrons within the protein. The pair-distance distribution function is obtained using the Indirect Fourier Transformation (Glatter, 1977), with a trial and error procedure at the end of which the obtained  $D_{max}$  corresponds to the

smoothest and positive distribution. Differences in the  $D_{max}$  of a protein relate to conformational changes. Additionally, it is possible to calculate the  $R_g$  from the Pair-Distance Distribution Function and compare its value with that estimated from the Guinier plot. SAXS parameters for all the proteins are listed in [Table S2](#).

The  $R_g$  values calculated using the  $P(r)$  function for C2AB and for SYT1C2A are in good agreement with those estimated from the Guinier plot. The Porod volume and Porod exponent were used to estimate the molecular weight and the flexibility. The dimensionless Kratky plot was used to investigate the flexibility (and shape) of the proteins ([Figure S4](#)). The maximum value of 1.104 at  $\sqrt{3}$  (dashed black line) corresponds to a globular and compact protein, similar to the bovine serum albumin (BSA) protein used as a standard in these experiments. In all of our cases the maxima are shifted to the right (larger than  $\sqrt{3}$ ) and the maximum is higher than the standard, which denotes a well-folded but asymmetric shape for them.

### **Molecular docking**

PS and PI(4,5)P<sub>2</sub> were used for virtual screen against SYT1C2A structure in complex with Ca<sup>2+</sup> using GOLD 5.4.1 (Genetic Optimisation for Ligand Docking) software (Jones et al., 1997). Ligand docking was performed using the fast genetic algorithm search option; the protein was treated as rigid and full flexibility was allowed for the ligands; the binding site was defined as the residues with at least one heavy atom within 10 Å from the centroid of the residues in the basic crevasse where the reference ligands are placed (PDB codes 3GPE, 4NP9 and 4NS0); early termination was allowed if the three top solutions are within 0.5 Å. The GOLD software (using the default CHEMPLP scoring function) automatically scores the resulting ligand solutions and it selects those complexes that represent potentially meaningful interactions.

### **Molecular modeling and molecular dynamics simulations**

The CHARMM-GUI Membrane Builder pipeline (Wu et al., 2014) was employed to construct two model systems consisting of SYT1C2A in juxtaposition to the inner leaflet of two distinct well-packed lipid bilayers, PS-M and PSPIP-M. The PI(4,5)P<sub>2</sub>-free PS-M membrane was composed of 152 dimyristoylphosphoserine (DMPS) and 18 sitosterol molecules in the outer layer and 145 DMPS and 18 sitosterol molecules in the inner layer; the PI(4,5)P<sub>2</sub>-enriched PSPIP-M membrane contained 158 DMPS and 20 sitosterol molecules in the outer layer and 45 DMPS, 90 dimyristoylphosphatidylinositol(4,5)biphosphate (DMPI) and 18 sitosterol molecules in the inner layer. Myristic acid was chosen as a representative fatty acid for computational tractability. The initially identical protein orientation in both cases was unbiasedly dictated by the PPM web server that makes extensive use of the Orientations of Proteins in Membranes (OPM) database (Lomize et al., 2012). The whole protein and the lipid head groups on both sides of the membrane were then solvated along the Z axis with a

10-Å thick layer of TIP3P water molecules (~26,500 in all) and the bulk ion concentration was set at 0.15 M KCl. The AMBER *ff14SB* (Maier et al., 2015) and *lipid14* (Dickson et al., 2014) force fields were used for protein and lipids, respectively. Consistent parameters and point charges were derived for sitosterol (Madej et al., 2015) and DMPI using *antechamber* in AMBER18 (<https://ambermd.org/>).

The geometry of both complexes was optimized by carrying out a series of progressive energy minimizations, essentially as described (Perona et al., 2020), and the resulting coordinate sets were first heated up to 100 K over 5 ps at constant volume using the Langevin thermostat and thereafter to 303 K over 100 ps. This temperature was maintained during 5 ns to equilibrate the system's dimensions and density at a constant pressure of 1 atm by means of a Berendsen barostat and anisotropic scaling. The unrestrained MD simulations under these conditions were further extended for data collection using the *pmemd.cuda* code (Salomon-Ferrer et al., 2013), as implemented in AMBER18, running on single Nvidia® GPUs up to a total simulation time of 485 ns. The coupling constants for the temperature and pressure baths were 1.0 and 0.2 ps, respectively. The application of SHAKE to all bonds allowed an integration time step of 2 fs to be used. The cutoff distance for the nonbonded interactions was 9 Å and the list of nonbonded pairs was updated every 25 steps. Periodic boundary conditions were applied and electrostatic interactions were represented using the smooth particle-mesh Ewald method (Darden et al., 1993) with a grid spacing of 1 Å. Trajectory snapshots were saved every 0.1 ns and figures generated by PyMOL were concatenated for movie production using ImageMagick (<https://imagemagick.org>).

All-atom structural models of SYT1C2B, SYT1C2AB, and SMPC2A were built using the threading methods implemented in the Phyre 2.0 (Kelley et al., 2015) and Swiss-Model (Biasini et al., 2014) servers by providing the amino acid sequence deposited in UniProtKB under the code Q9SKR2 (SYT1\_ARATH). The best protein template of known 3D structure was PDB entry 4P42 (ref.). The RCD+ server (Lopez-Blanco et al., 2016) was employed to fill in existing gaps and generate alternative loop conformations of the intrinsically disordered regions. Membrane insertion, energy minimization, and unrestrained MD simulations proceeded as explained above for SYT1C2A.

### **Isothermal Titration Calorimetry (ITC)**

ITC experiments were carried out at 25° C using a MicroCal VP-ITC (GE-Healthcare). The C2A construct was equilibrated in 50 mM Hepes pH 8.0, and 50 mM NaCl; Ca<sup>2+</sup> solutions were prepared using the same buffer. Samples were degassed before use. Titration was carried out by injecting consecutive aliquots of 20 mM Ca<sup>2+</sup> (1 × 1 μL, 10 × 5 μL, and 10 × 10 μL) into the sample cell loaded with 151 μM C2A. Heat that developed on Ca<sup>2+</sup> dilution was found to be negligible. The thermodynamic parameters of binding were calculated analyzing the binding isotherm with the MicroCal ITC Origin software.

### Thermal shift assay

Label-free thermal shift assays with SYT1C2A, SYT1C2A-DADA, SYT1C2A-PolyB, SYT1C2B and GST as negative control were performed using Tycho NT. 6 (NanoTemper Technologies). Assays were done at 5.8  $\mu$ M protein in 0.2 mM Tris-HCl pH 8.0, 0.5 mM NaCl and run in duplicates in Tycho NT.6 capillaries (NanoTemper Technologies, Cat# TY-C001). Different protein solutions were prepared to reach a final  $\text{CaCl}_2$  concentrations of 0.01 mM, 0.03 mM, 0.3 mM, and 3 mM. Ligand binding assays were performed at 58  $\mu$ M ligand and at 0.02 mM EGTA. Since SYTC2B data was not completely sigmoidal, a smoothing of the first derivative data was performed every 1° C for  $T_i$  calculation. Intrinsic fluorescence was recorded at 330 nm and 350 nm while heating the sample from 35° –95° C at a rate of 30°C/min. The ratio of fluorescence (350 nm/330 nm) and the  $T_i$  were calculated by Tycho NT. 6.

### Bio-layer interferometry

Lipid-protein interactions were measured by bio-layer interferometry using a single channel BLItz system (ForteBio). Small Unilamellar Vesicles (SUVs) of PC/PS (phosphatidylcholine/phosphatidylserine) 75:25 and PC/PS/PI (phosphatidylinositol) 65:25:10 stocks in chloroform at 2 mg/mL were diluted in SLB buffer (50 mM Tris-HCl pH 7.5, 150 mM KCl) to a final concentration of 0.5 mg/mL, vortexed for 5 min and sonicated for 15 min until a homogeneous solution was achieved. Membranes were then immobilized on a previously hydrated aminopropylsilane biosensor tip (ForteBio). All the protein fragments at 0.5  $\mu$ M were posteriorly associated to the SUVs in 50 mM Tris-HCl pH 8.0, 50 mM NaCl and 10  $\mu$ M  $\text{CaCl}_2$  or 100  $\mu$ M  $\text{CaCl}_2$  for PC/PS or PC/PS/PI respectively.  $\text{Ca}^{2+}$  free assays were performed with 20  $\mu$ M EGTA.  $\text{IP}_3$  binding assays were performed at 5.8  $\mu$ M. In the case of SYT1C2a-PolyB, BSA was previously associated to discard unspecific interactions with the lipid vesicles. A positive control associating BSA before SYT1C2A was also carried out. For SYT1C2B, a subtraction of the sensogram corresponding to the unspecific binding of GST was performed. Binding reactions consisted of a 60 s baseline (buffer), followed by a 300 s association phase (membranes or protein binding), and a 330 s dissociation phase (buffer only). BLItz Pro software was used to analyze experimental results.

### Phospholipid Binding Assays

Phospholipid mixtures of PC/PS 75:25 and PC/PS/PI 65:25:10 in chloroform were dried under a stream of nitrogen until a thin layer of lipids was obtained. Dried phospholipids were kept under vacuum overnight and were posteriorly resuspended in Liposome Buffer (50 mM Tris-HCl pH 7.5, 80 mM KCl, 5 mM NaCl) to a final concentration of 1 mg/mL. Lipids were left in Liposome Buffer for 25 minutes at 20° C before sonicating for 7 minutes until a homogeneous solution was achieved. Protein-liposome mixtures (40  $\mu$ g-100  $\mu$ g) were incubated for 30 min at 25° C in a final volume of 200  $\mu$ L. Assays were



performed at a final  $\text{Ca}^{2+}$  concentration of 300  $\mu\text{M}$ .  $\text{Ca}^{2+}$  free assays were performed with 20  $\mu\text{M}$  EGTA. Controls of all samples were prepared by the addition of Liposome Buffer instead of phospholipids. GST binding to liposomes was also measured as negative control. Samples were centrifugated at 58000 rpm for 1 hour at 4° C in order to pellet the liposomes. To effectively measure the amount of protein present in the supernatant, the intrinsic fluorescence of the unfolded samples was measured at 80° C at 330 nm and 350 nm in order to subtract the effect of the chemical environment on the tryptophan using Tycho NT. 6. The amount of protein seized by the phospholipids was calculated as the percentage of the difference between the fluorescence of the control and the sample. Controls were considered to be the total amount of protein present in the assays.

### Acknowledgements

This work was funded by grants from Agencia Estatal de Investigación (AEI, Spain) and Fondo Europeo de Desarrollo Regional (FEDER, European Union) (BIO2017-89523-R to A. Albert). A. Albert and D. Siliqi thank ALBA (beamline XALOC) and Diamond Light Source (beamline B21, proposal MX21741) for granting access to the synchrotron radiation source. We thank Nathan Cowieson and Charlotte J. C. Edwards-Gayle from Diamond Light Source for their assistance in the preparation of the SAXS experiments.

### References

- Adams, P.D., Afonine, P.V., Bunkoczi, G., Chen, V.B., Davis, I.W., Echols, N., Headd, J.J., Hung, L.W., Kapral, G.J., Grosse-Kunstleve, R.W., *et al.* (2010). PHENIX: a comprehensive Python-based system for macromolecular structure solution title. *Acta crystallographica. Section D, Biological crystallography* 66, 213-221.
- Ausili, A., Corbalan-Garcia, S., Gomez-Fernandez, J.C., and Marsh, D. (2011). Membrane docking of the C2 domain from protein kinase Calpha as seen by polarized ATR-IR. The role of PIP(2). *Biochim Biophys Acta* 1808, 684-695.
- Bian, X., Saheki, Y., and De Camilli, P. (2018).  $\text{Ca}^{2+}$  releases E-Syt1 autoinhibition to couple ER-plasma membrane tethering with lipid transport. *EMBO J* 37, 219-234.
- Biasini, M., Bienert, S., Waterhouse, A., Arnold, K., Studer, G., Schmidt, T., Kiefer, F., Gallo Cassarino, T., Bertoni, M., Bordoli, L., *et al.* (2014). SWISS-MODEL: modelling protein tertiary and quaternary structure using evolutionary information. *Nucleic Acids Res* 42, W252-258.
- Cho, W., and Stahelin, R.V. (2006). Membrane binding and subcellular targeting of C2 domains. *Biochim Biophys Acta* 1761, 838-849.
- Collado, J., Kalemanov, M., Campelo, F., Bourgoint, C., Thomas, F., Loewith, R., Martinez-Sanchez, A., Baumeister, W., Stefan, C.J., and Fernandez-Busnadiego, R. (2019). Tricalbin-Mediated Contact Sites Control ER Curvature to Maintain Plasma Membrane Integrity. *Dev Cell* 51, 476-487 e477.
- Cowieson, N.P., Edwards-Gayle, C.J.C., Inoue, K., Khunti, N.S., Douth, J., Williams, E., Daniels, S., Preece, G., Krumpa, N.A., Sutter, J.P., *et al.* (2020). Beamline B21: high-throughput small-angle X-ray scattering at Diamond Light Source. *J Synchrotron Radiat* 27, 1438-1446.

- Creutz, C.E., Snyder, S.L., and Schulz, T.A. (2004). Characterization of the yeast tricalbins: membrane-bound multi-C2-domain proteins that form complexes involved in membrane trafficking. *Cell Mol Life Sci* *61*, 1208-1220.
- Darden, T., York, D., and Pedersen, L. (1993). Particle mesh Ewald: An  $N \cdot \log(N)$  method for Ewald sums in large systems. *The Journal of Chemical Physics* *98*, 10089-10092.
- DeLano (2002). The PyMOL Molecular Graphics System. L. Schrödinger, ed.
- Di Paolo, G., and De Camilli, P. (2006). Phosphoinositides in cell regulation and membrane dynamics. *Nature* *443*, 651-657.
- Diaz, M., Sanchez-Barrena, M.J., Gonzalez-Rubio, J.M., Rodriguez, L., Fernandez, D., Antoni, R., Yunta, C., Belda-Palazon, B., Gonzalez-Guzman, M., Peirats-Llobet, M., *et al.* (2016). Calcium-dependent oligomerization of CAR proteins at cell membrane modulates ABA signaling. *Proc Natl Acad Sci U S A* *113*, E396-405.
- Dickson, C.J., Madej, B.D., Skjevik, A.A., Betz, R.M., Teigen, K., Gould, I.R., and Walker, R.C. (2014). Lipid14: the AMBER lipid force field. *J Chem Theory Comput* *10*, 865-879.
- Emsley, P., and Cowtan, K. (2004). Coot: model-building tools for molecular graphics title. *Acta crystallographica. Section D, Biological crystallography* *60*, 2126-2132.
- Feign, L.A., and Svergun, D.I. (1987). *Structure Analysis by Small Angle X-ray and Neutron Scattering*. Plenum Press, New York
- Fernandez, I., Arac, D., Ubach, J., Gerber, S.H., Shin, O., Gao, Y., Anderson, R.G., Sudhof, T.C., and Rizo, J. (2001). Three-dimensional structure of the synaptotagmin 1 C2B-domain: synaptotagmin 1 as a phospholipid binding machine. *Neuron* *32*, 1057-1069.
- Fernandez-Busnadiego, R., Saheki, Y., and De Camilli, P. (2015). Three-dimensional architecture of extended synaptotagmin-mediated endoplasmic reticulum-plasma membrane contact sites. *Proc Natl Acad Sci U S A* *112*, E2004-2013.
- Fernandez-Chacon, R., Shin, O.H., Konigstorfer, A., Matos, M.F., Meyer, A.C., Garcia, J., Gerber, S.H., Rizo, J., Sudhof, T.C., and Rosenmund, C. (2002). Structure/function analysis of  $Ca^{2+}$  binding to the C2A domain of synaptotagmin 1. *J Neurosci* *22*, 8438-8446.
- Ferrer-Orta, C., Perez-Sanchez, M.D., Coronado-Parra, T., Silva, C., Lopez-Martinez, D., Baltanas-Copado, J., Gomez-Fernandez, J.C., Corbalan-Garcia, S., and Verdaguer, N. (2017). Structural characterization of the Rabphilin-3A-SNAP25 interaction. *Proc Natl Acad Sci U S A* *114*, E5343-E5351.
- Fouillen, L., Maneta-Peyret, L., and Moreau, P. (2018). ER Membrane Lipid Composition and Metabolism: Lipidomic Analysis. *Methods Mol Biol* *1691*, 125-137.
- Fuson, K., Rice, A., Mahling, R., Snow, A., Nayak, K., Shanbhogue, P., Meyer, A.G., Redpath, G.M., Hinderliter, A., Cooper, S.T., *et al.* (2014). Alternate splicing of dysferlin C2A confers  $Ca^{2+}$ -dependent and  $Ca^{2+}$ -independent binding for membrane repair. *Structure* *22*, 104-115.
- Giordano, F., Saheki, Y., Idevall-Hagren, O., Colombo, S.F., Pirruccello, M., Milosevic, I., Gracheva, E.O., Bagriantsev, S.N., Borgese, N., and De Camilli, P. (2013).  $PI(4,5)P_2$ -dependent and  $Ca^{2+}$ -regulated ER-PM interactions mediated by the extended synaptotagmins. *Cell* *153*, 1494-1509.
- Glatter, O. (1977). A new method for the evaluation of small-angle scattering data. *J Appl Cryst.* *10*, 415-421.
- Groom, C.R., Bruno, I.J., Lightfoot, M.P., and Ward, S.C. (2016). The Cambridge Structural Database. *Acta Crystallogr B Struct Sci Cryst Eng Mater* *72*, 171-179.
- Guerrero-Valero, M., Ferrer-Orta, C., Querol-Audi, J., Marin-Vicente, C., Fita, I., Gomez-Fernandez, J.C., Verdaguer, N., and Corbalan-Garcia, S. (2009). Structural and

mechanistic insights into the association of PKC $\alpha$ -C2 domain to PtdIns(4,5)P<sub>2</sub>. *Proc Natl Acad Sci U S A* *106*, 6603-6607.

Guillen, J., Ferrer-Orta, C., Buxaderas, M., Perez-Sanchez, D., Guerrero-Valero, M., Luengo-Gil, G., Pous, J., Guerra, P., Gomez-Fernandez, J.C., Verdager, N., *et al.* (2013). Structural insights into the Ca<sup>2+</sup> and PI(4,5)P<sub>2</sub> binding modes of the C2 domains of rabphilin 3A and synaptotagmin 1. *Proc Natl Acad Sci U S A* *110*, 20503-20508.

Guinier, A. (1939). La diffraction des rayons X aux très petits angles: application à l'étude de phénomènes ultramicroscopiques. *Ann Phys.* *11*, 161-237.

Honigmann, A., van den Bogaart, G., Iraheta, E., Risselada, H.J., Milovanovic, D., Mueller, V., Mullar, S., Diederichsen, U., Fasshauer, D., Grubmuller, H., *et al.* (2013). Phosphatidylinositol 4,5-bisphosphate clusters act as molecular beacons for vesicle recruitment. *Nat Struct Mol Biol* *20*, 679-686.

Hou, Q., Ufer, G., and Bartels, D. (2016). Lipid signalling in plant responses to abiotic stress. *Plant Cell Environ* *39*, 1029-1048.

Howell, S.C., Mesleh, M.F., and Opella, S.J. (2005). NMR structure determination of a membrane protein with two transmembrane helices in micelles: MerF of the bacterial mercury detoxification system. *Biochemistry* *44*, 5196-5206.

Hura, G.L., Menon, A.L., Hammel, M., Rambo, R.P., Poole, F.L., 2nd, Tsutakawa, S.E., Jenney, F.E., Jr., Classen, S., Frankel, K.A., Hopkins, R.C., *et al.* (2009). Robust, high-throughput solution structural analyses by small angle X-ray scattering (SAXS). *Nat Methods* *6*, 606-612.

Idevall-Hagren, O., Lu, A., Xie, B., and De Camilli, P. (2015). Triggered Ca<sup>2+</sup> influx is required for extended synaptotagmin 1-induced ER-plasma membrane tethering. *EMBO J* *34*, 2291-2305.

Jones, G., Willett, P., Glen, R.C., Leach, A.R., and Taylor, R. (1997). Development and validation of a genetic algorithm for flexible docking. *J Mol Biol* *267*, 727-748.

Kabsch, W. (2010). Xds. *Acta crystallographica. Section D, Biological crystallography* *66*, 125-132.

Kelley, L.A., Mezulis, S., Yates, C.M., Wass, M.N., and Sternberg, M.J. (2015). The Phyre2 web portal for protein modeling, prediction and analysis. *Nat Protoc* *10*, 845-858.

Komander, D., Fairservice, A., Deak, M., Kular, G.S., Prescott, A.R., Peter Downes, C., Safrany, S.T., Alessi, D.R., and van Aalten, D.M. (2004). Structural insights into the regulation of PDK1 by phosphoinositides and inositol phosphates. *EMBO J* *23*, 3918-3928.

Kraubeta, M., and Haucke, V. (2016). Directing lipid transport at membrane contact sites. *Nat Cell Biol* *18*, 461-463.

Lee, E., Vanneste, S., Perez-Sancho, J., Benitez-Fuente, F., Strelau, M., Macho, A.P., Botella, M.A., Friml, J., and Rosado, A. (2019). Ionic stress enhances ER-PM connectivity via phosphoinositide-associated SYT1 contact site expansion in Arabidopsis. *Proc Natl Acad Sci U S A* *116*, 1420-1429.

Lee, E., Vila Nova Santana, B., Samuels, E., Benitez-Fuente, F., Corsi, E., Botella, M.A., Perez-Sancho, J., Vanneste, S., Friml, J., Macho, A., *et al.* (2020). Rare earth elements induce cytoskeleton-dependent and PI4P-associated rearrangement of SYT1/SYT5 ER-PM contact site complexes in Arabidopsis. *J Exp Bot*.

Lomize, M.A., Pogozheva, I.D., Joo, H., Mosberg, H.I., and Lomize, A.L. (2012). OPM database and PPM web server: resources for positioning of proteins in membranes. *Nucleic Acids Res* *40*, D370-376.

Lopez-Blanco, J.R., Canosa-Valls, A.J., Li, Y., and Chacon, P. (2016). RCD+: Fast loop modeling server. *Nucleic Acids Res* *44*, W395-400.

- Madej, B.D., Gould, I.R., and Walker, R.C. (2015). A parameterization of cholesterol for mixed lipid bilayer simulation within the AMBER Lipid14 force field. *J Phys Chem B* *119*, 12424-12435.
- Magnusson, A.O., Szekrenyi, A., Joosten, H.J., Finnigan, J., Charnock, S., and Fessner, W.D. (2019). nanoDSF as screening tool for enzyme libraries and biotechnology development. *FEBS J* *286*, 184-204.
- Maier, J.A., Martinez, C., Kasavajhala, K., Wickstrom, L., Hauser, K.E., and Simmerling, C. (2015). ff14SB: improving the accuracy of protein side chain and backbone parameters from ff99SB. *J Chem Theory Comput* *11*, 3696-3713.
- McAinsh, M.R., Brownlee, C., and Hetherington, A.M. (1990). Abscisic acid-induced elevation of guard cell cytosolic Ca<sup>2+</sup> precedes stomatal closure. *Nature* *343*, 186-188.
- McMahon, H.T., and Boucrot, E. (2015). Membrane curvature at a glance. *J Cell Sci* *128*, 1065-1070.
- McMahon, H.T., Kozlov, M.M., and Martens, S. (2010). Membrane curvature in synaptic vesicle fusion and beyond. *Cell* *140*, 601-605.
- Min, S.W., Chang, W.P., and Sudhof, T.C. (2007). E-Syts, a family of membranous Ca<sup>2+</sup>-sensor proteins with multiple C2 domains. *Proc Natl Acad Sci U S A* *104*, 3823-3828.
- Pemberton, J.G., and Balla, T. (2018). Polyphosphoinositide-Binding Domains: Insights from Peripheral Membrane and Lipid-Transfer Proteins. *Adv Exp Med Biol*.
- Perez-Sancho, J., Tilsner, J., Samuels, A.L., Botella, M.A., Bayer, E.M., and Rosado, A. (2016). Stitching Organelles: Organization and Function of Specialized Membrane Contact Sites in Plants. *Trends Cell Biol* *26*, 705-717.
- Perez-Sancho, J., Vanneste, S., Lee, E., McFarlane, H.E., Esteban Del Valle, A., Valpuesta, V., Friml, J., Botella, M.A., and Rosado, A. (2015). The Arabidopsis synaptotagmin1 is enriched in endoplasmic reticulum-plasma membrane contact sites and confers cellular resistance to mechanical stresses. *Plant Physiol* *168*, 132-143.
- Perona, A., Ros, M.P., Mills, A., Morreale, A., and Gago, F. (2020). Distinct binding of cetirizine enantiomers to human serum albumin and the human histamine receptor H1. *J Comput Aided Mol Des* *34*, 1045-1062.
- Prasad, R., and Zhou, H.X. (2020). Membrane Association and Functional Mechanism of Synaptotagmin-1 in Triggering Vesicle Fusion. *Biophys J* *119*, 1255-1265.
- Rambo, R.P., and Tainer, J.A. (2011). Characterizing flexible and intrinsically unstructured biological macromolecules by SAS using the Porod-Debye law. *Biopolymers* *95*, 559-571.
- Rizo, J., and Sudhof, T.C. (1998). C2-domains, structure and function of a universal Ca<sup>2+</sup>-binding domain. *The Journal of biological chemistry* *273*, 15879-15882.
- Ruiz-Lopez, N., Pérez-Sancho, J., Esteban del Valle, A., Haslam, R.P., Vanneste, S., Catalá, R., Perea-Resa, C., Van Damme, D., García-Hernández, S., Albert, A., *et al.* (2020). Synaptotagmins Maintain Diacylglycerol Homeostasis at Endoplasmic Reticulum-Plasma Membrane Contact Sites during Abiotic Stress. *bioRxiv*.
- Saheki, Y. (2017). Endoplasmic Reticulum - Plasma Membrane Crosstalk Mediated by the Extended Synaptotagmins. *Adv Exp Med Biol* *997*, 83-93.
- Saheki, Y., Bian, X., Schauder, C.M., Sawaki, Y., Surma, M.A., Klose, C., Pincet, F., Reinisch, K.M., and De Camilli, P. (2016). Control of plasma membrane lipid homeostasis by the extended synaptotagmins. *Nat Cell Biol* *18*, 504-515.
- Saheki, Y., and De Camilli, P. (2017a). Endoplasmic Reticulum-Plasma Membrane Contact Sites. *Annu Rev Biochem* *86*, 659-684.
- Saheki, Y., and De Camilli, P. (2017b). The Extended-Synaptotagmins. *Biochim Biophys Acta*.

- Salomon-Ferrer, R., Götz, A.W., Poole, D., Le Grand, S., and Walker, R.C. (2013). Routine microsecond molecular dynamics simulations with AMBER on GPUs. 2. Explicit solvent Particle Mesh Ewald. *Journal of Chemical Theory and Computation* 9, 3878-3888.
- Schapiro, A.L., Valpuesta, V., and Botella, M.A. (2009). Plasma membrane repair in plants. *Trends in plant science* 14, 645-652.
- Schapiro, A.L., Voigt, B., Jasik, J., Rosado, A., Lopez-Cobollo, R., Menzel, D., Salinas, J., Mancuso, S., Valpuesta, V., Baluska, F., *et al.* (2008). Arabidopsis synaptotagmin 1 is required for the maintenance of plasma membrane integrity and cell viability. *The Plant cell* 20, 3374-3388.
- Schauder, C.M., Wu, X., Saheki, Y., Narayanaswamy, P., Torta, F., Wenk, M.R., De Camilli, P., and Reinisch, K.M. (2014). Structure of a lipid-bound extended synaptotagmin indicates a role in lipid transfer. *Nature* 510, 552-555.
- Schneidman-Duhovny, D., Hammel, M., Tainer, J.A., and Sali, A. (2016). FoXS, FoXSDock and MultiFoXS: Single-state and multi-state structural modeling of proteins and their complexes based on SAXS profiles. *Nucleic Acids Res* 44, W424-429.
- Sharpe, H.J., Stevens, T.J., and Munro, S. (2010). A comprehensive comparison of transmembrane domains reveals organelle-specific properties. *Cell* 142, 158-169.
- Sultana, A., and Lee, J.E. (2015). Measuring protein-protein and protein-nucleic Acid interactions by biolayer interferometry. *Curr Protoc Protein Sci* 79, 19 25 11-19 25 26.
- Verdaguer, N., Corbalan-Garcia, S., Ochoa, W.F., Fita, I., and Gomez-Fernandez, J.C. (1999). Ca(2+) bridges the C2 membrane-binding domain of protein kinase C $\alpha$  directly to phosphatidylserine. *EMBO J* 18, 6329-6338.
- Wang, P., Hawes, C., and Hussey, P.J. (2017). Plant Endoplasmic Reticulum-Plasma Membrane Contact Sites. *Trends in plant science* 22, 289-297.
- Winn, M.D., Ballard, C.C., Cowtan, K.D., Dodson, E.J., Emsley, P., Evans, P.R., Keegan, R.M., Krissinel, E.B., Leslie, A.G., McCoy, A., *et al.* (2011). Overview of the CCP4 suite and current developments. *Acta crystallographica. Section D, Biological crystallography* 67, 235-242.
- Wong, L.H., Gatta, A.T., and Levine, T.P. (2018). Lipid transfer proteins: the lipid commute via shuttles, bridges and tubes. *Nat Rev Mol Cell Biol*.
- Wu, E.L., Cheng, X., Jo, S., Rui, H., Song, K.C., Davila-Contreras, E.M., Qi, Y., Lee, J., Monje-Galvan, V., Venable, R.M., *et al.* (2014). CHARMM-GUI *Membrane Builder* toward realistic biological membrane simulations. *J Comput Chem* 35, 1997-2004.
- Xu, J., Bacaj, T., Zhou, A., Tomchick, D.R., Sudhof, T.C., and Rizo, J. (2014). Structure and Ca(2+)-binding properties of the tandem C(2) domains of E-Syt2. *Structure* 22, 269-280.
- Yu, H., Liu, Y., Gulbranson, D.R., Paine, A., Rathore, S.S., and Shen, J. (2016). Extended synaptotagmins are Ca<sup>2+</sup>-dependent lipid transfer proteins at membrane contact sites. *Proc Natl Acad Sci U S A* 113, 4362-4367.
- Zhang, H., Yin, W., and Xia, X. (2010). Shaker-like potassium channels in *Populus*, regulated by the CBL-CIPK signal transduction pathway, increase tolerance to low-K<sup>+</sup> stress. *Plant cell reports* 29, 1007-1012.
- Zhu, J.K. (2016). Abiotic Stress Signaling and Responses in Plants. *Cell* 167, 313-324.
- Zimmermann, L., Stephens, A., Nam, S.Z., Rau, D., Kubler, J., Lozajic, M., Gabler, F., Soding, J., Lupas, A.N., and Alva, V. (2018). A Completely Reimplemented MPI Bioinformatics Toolkit with a New HHpred Server at its Core. *J Mol Biol* 430, 2237-2243.

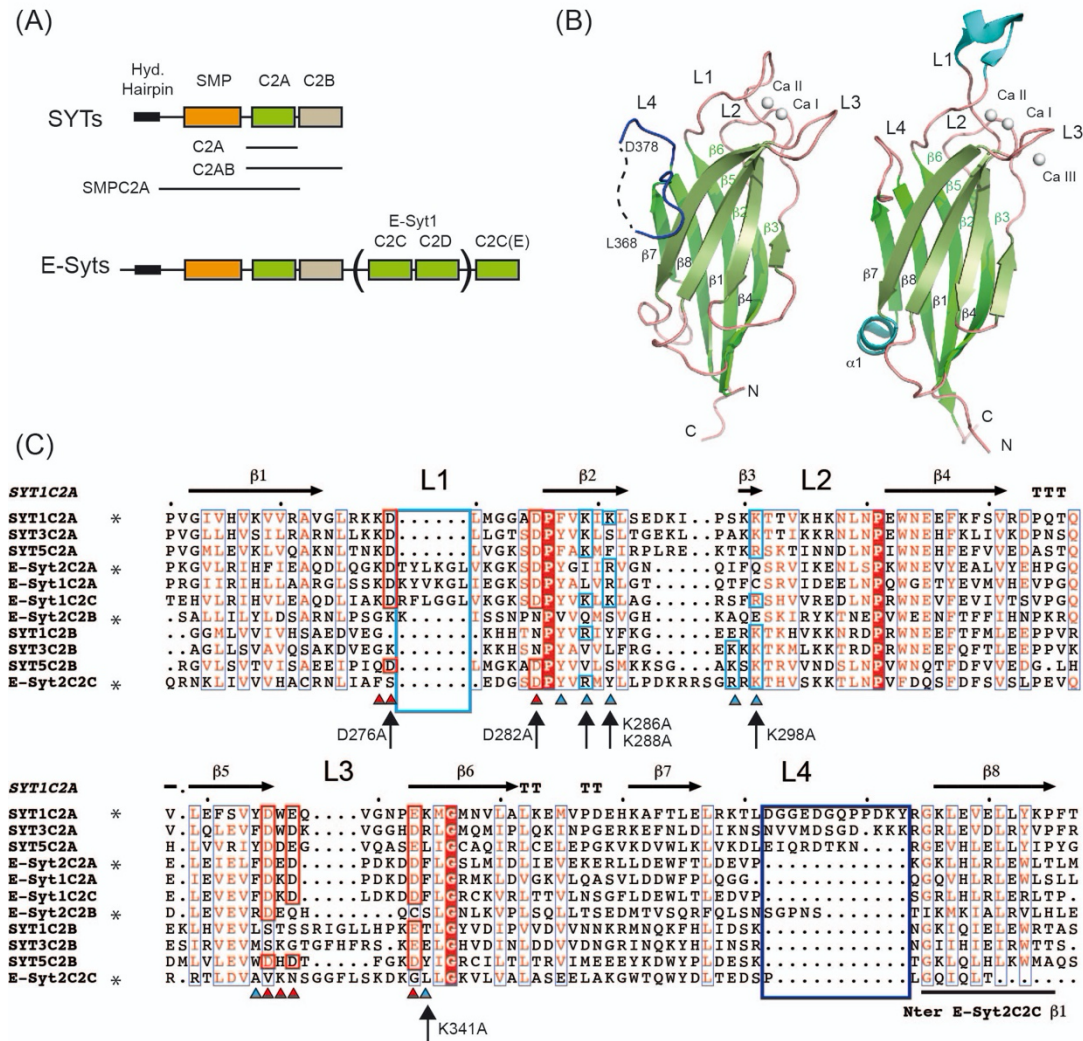

**Figure 1. The structure of the C2A domain of SYT1.** (A) Domain organization of plant (SYTs) and human (E-Syts) extended synaptotagmins. The constructs used in this work are indicated. (B) Ribbon representations of SYT1C2A (left) and E-Syt2 C2A (right), Ca<sup>2+</sup> ions are displayed as white spheres (C) Amino acid sequence alignment of the C2 domains of plant SYTs and human E-Syts. Proteins of known structure are marked with an asterisk. Residues involved in Ca<sup>2+</sup> binding are indicated with a red triangle and highlighted in red; residues likely to make up the polybasic sites are indicated with a blue triangle and highlighted in blue; secondary structural elements of SYT1C2A are indicated as arrows. SYT1C2A point mutations are indicated with arrows.

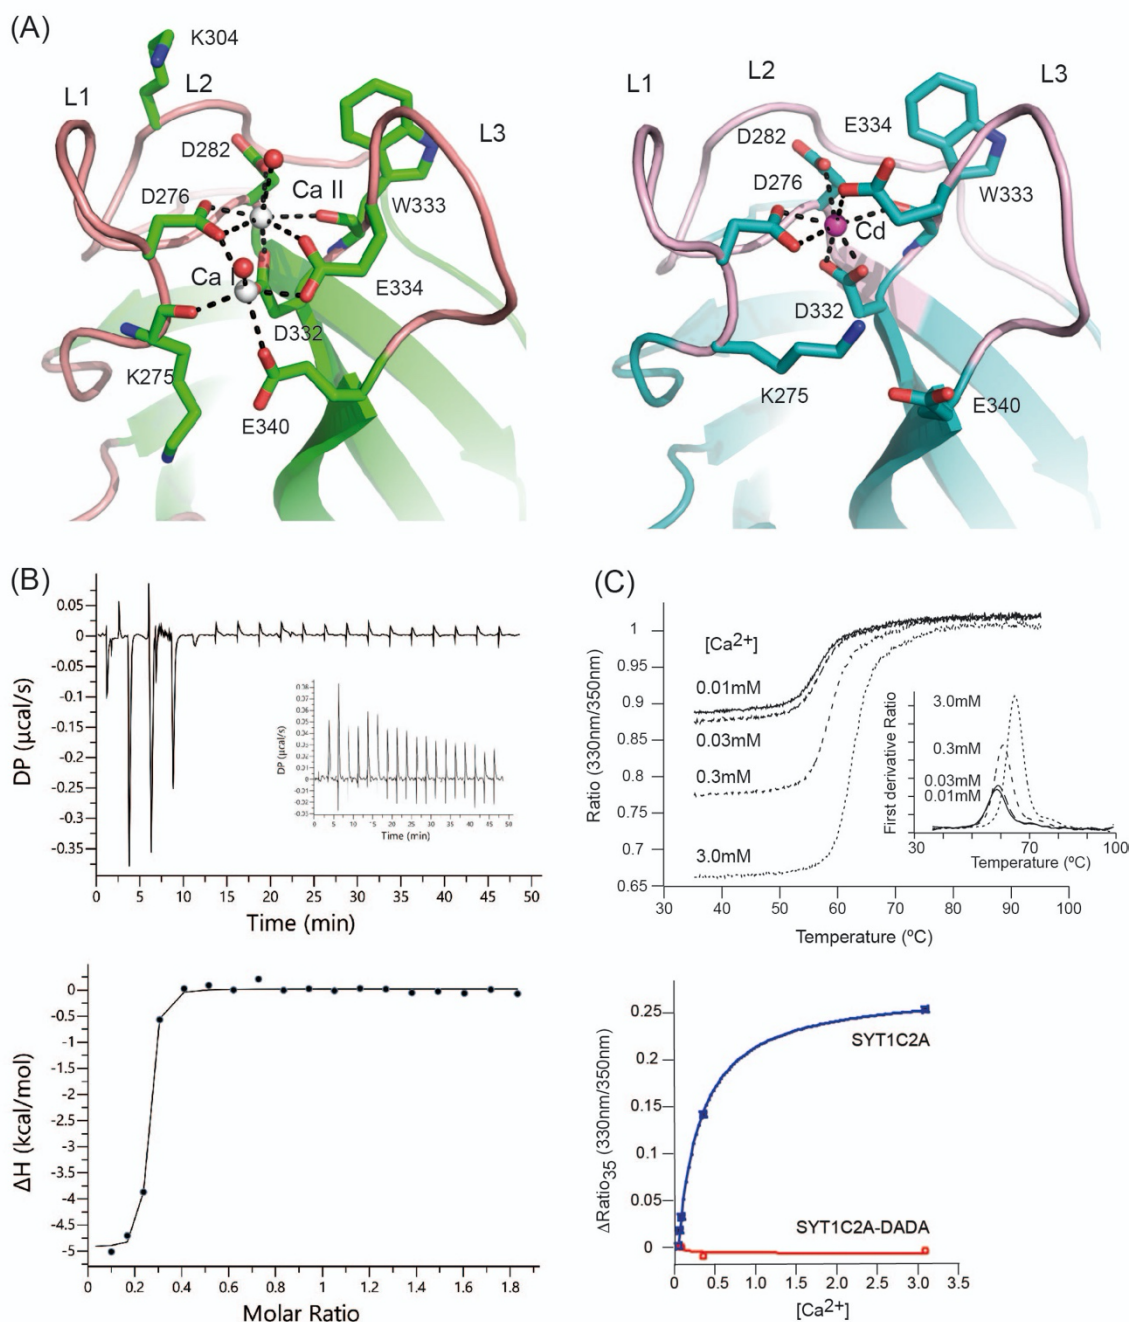

**Figure 2. The structure and properties of the  $\text{Ca}^{2+}$ -dependent lipid-binding site of SYT1C2A.** (A) A section of the structures of SYT1C2A in complex with  $\text{Ca}^{2+}$  (left) and  $\text{Cd}^{2+}$  (Right). (B) Calorimetric titration of SYT1C2A with  $\text{Ca}^{2+}$ . (upper panel) A representative thermogram obtained by the addition of 20 mM  $\text{CaCl}_2$  to a solution of 151  $\mu\text{M}$  SYT1C2A at 25  $^\circ\text{C}$ . The inset corresponds to the thermogram obtained by the addition of  $\text{CaCl}_2$  to a solution of SYT1C2A supplemented with 10  $\mu\text{M}$   $\text{CaCl}_2$ ; no detectable heat is observed. (Lower panel) Dependence of the heat released per mol of  $\text{Ca}^{2+}$  injected as a function of the  $\text{Ca}^{2+}$ :SYT1C2A molar ratio. The solid line corresponds to the best fit of the experimental data based on a one-set-of-sites model. (C) (Upper panel) Thermal denaturation of SYT1C2A at different  $\text{Ca}^{2+}$  concentrations. The inset represents the  $T_i$  determined as the maximum of the second derivative of the ratio between the

fluorescence emission at 330 and 350 nm. (Lower panel) Determination of the  $K_d$  of SYT1C2A and  $\text{Ca}^{2+}$  using the initial fluorescence change as a function of free  $\text{Ca}^{2+}$  concentration. Three independent replicates were performed.



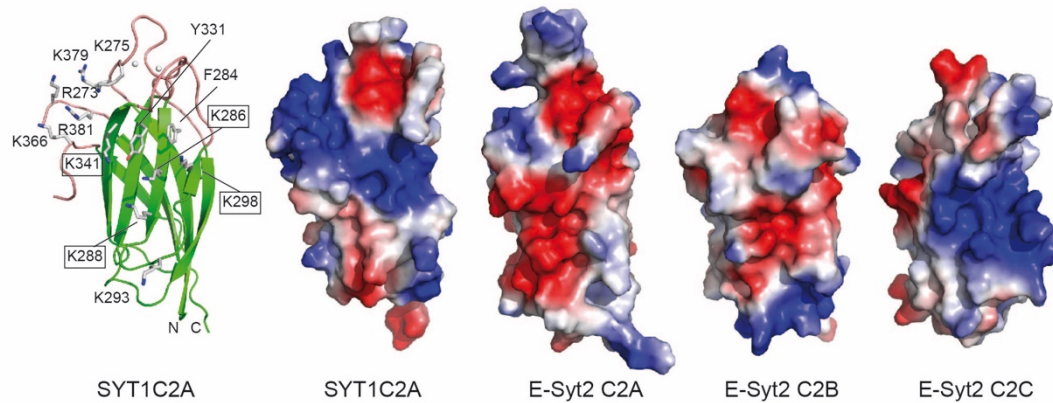

**Figure 3. The polybasic binding site of SYT1C2A and equivalent sites of C2 domains of E-Syt1.** (Left) Ribbon representation of the structure of SYT1C2A showing as sticks the side chains of those residues making up the polybasic binding site. (Right) Surface representation displaying the molecular electrostatic potentials of the SYT1C2A domain and C2 domains of E-Syt2. Those residues mutated to prepare the SYT1C2A-PolyB mutant protein are highlighted.

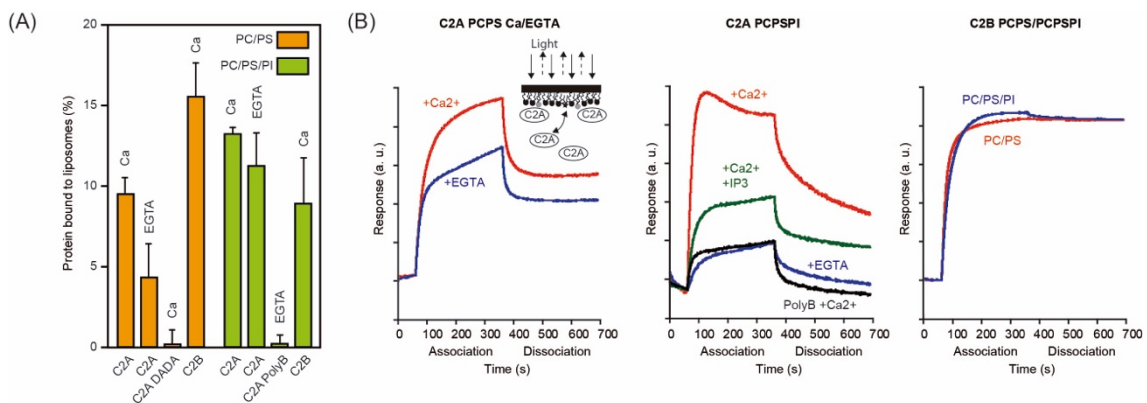

**Figure 4. Lipid binding properties of SYT1C2A.** (A) Comparative analyses of phospholipid binding of SYT1C2A and mutants. Protein quantifications of the soluble fraction after lipid pelleting were performed by measuring the intrinsic Trp fluorescence under denatured conditions. Lipid binding activity is expressed as the percentage of the bound protein to lipids. Error bars indicate the standard error calculated from three independent measurements. (B) Representative sensograms representing the binding of SYT1C2A, SYT1C2A-PolyB and SYT1C2B to a PC/PS or to a PC/PS/PI monolayers in the presence of Ca<sup>2+</sup>, EGTA or IP<sub>3</sub>. The inset represents a scheme of a BLI biosensor in a SYT1C2A bound state. As molecules bind the surface, the layer thickens at the end of the tip and the path length of the reflected light changes.

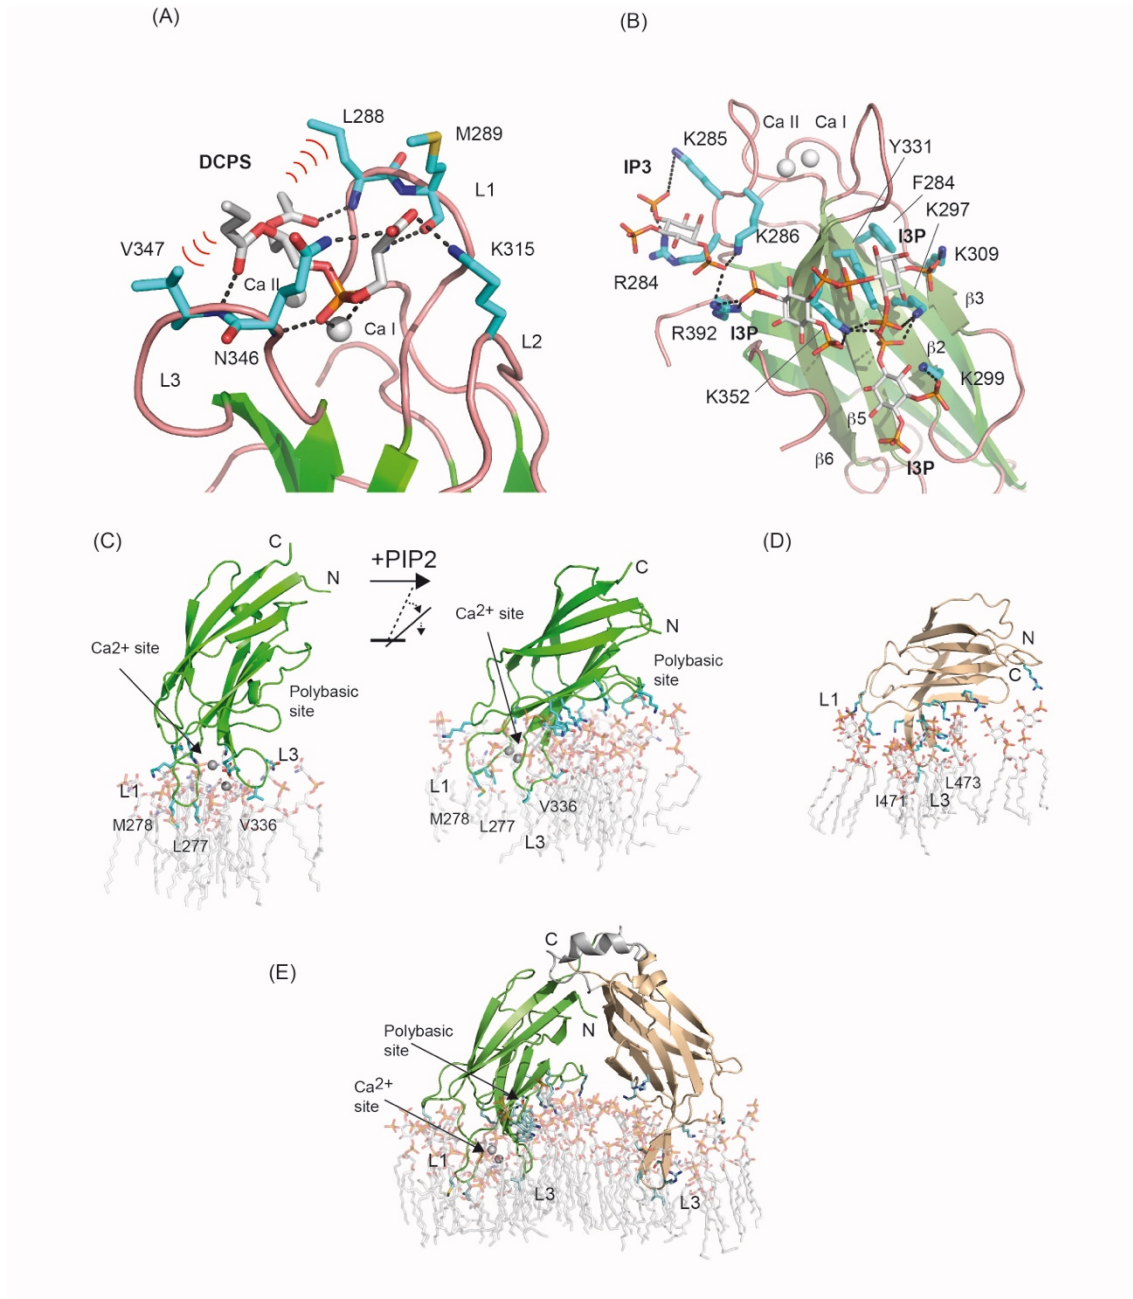

**Figure 5. SYT1C2A recognizes PS and phosphorylated inositol lipids.** Computational model of the Ca<sup>2+</sup>-dependent and polybasic lipid-binding site in complex with DCPS (A) and IP3 (B) showing the predicted hydrogen bond and polar interactions between ligands and protein. Relevant hydrophobic interactions are also highlighted. (C) Comparison of the association of SYT1C2A to the PS-M (left) and to the PSPIP-M (right). (D) The association of SYT1C2B and (E) SYT1C2AB to the PSPIP-M. The views in (C), (D) and (E) show those residues and lipids involved in protein membrane interaction.

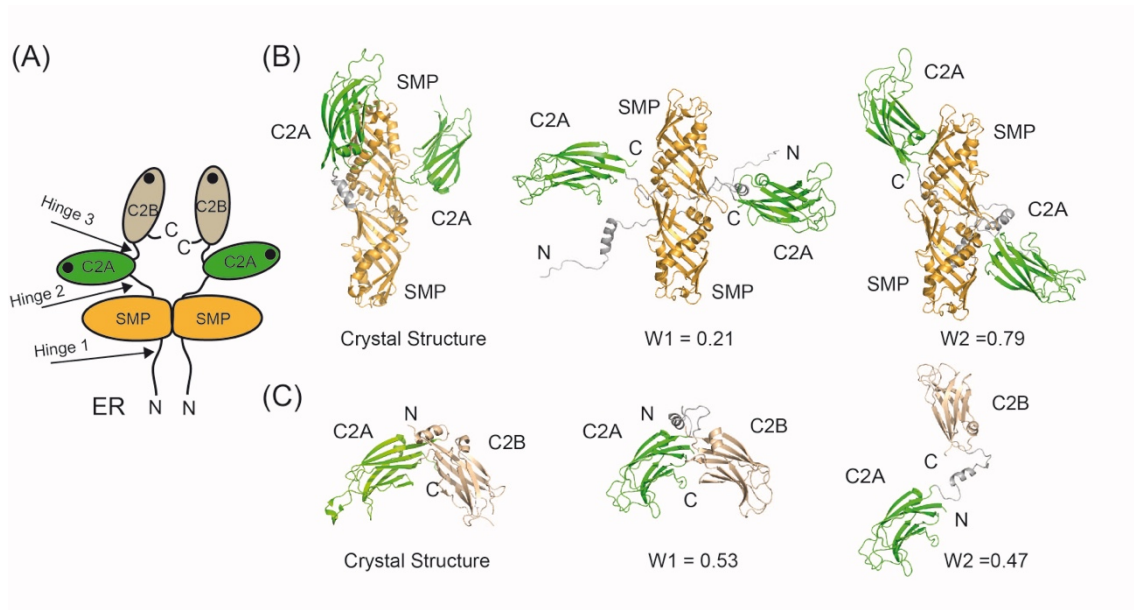

**Figure 6. Low-resolution structure of SYT1.** (A) Schematic representation of the structure and topology of SYT1 (B) Comparison of the ribbon representation of the SMPC2A fragment of E-Syt2 crystal structure with two representative conformations of SYT1 SMPC2A fragment in solution. (C) Comparison of the ribbon representation of the C2AB fragment of E-Syt2 crystal structure with two representative conformations of SYT1C2AB fragment in solution. The relative weight of each conformer as estimated from MultiFox server is indicated (W1 and W2).

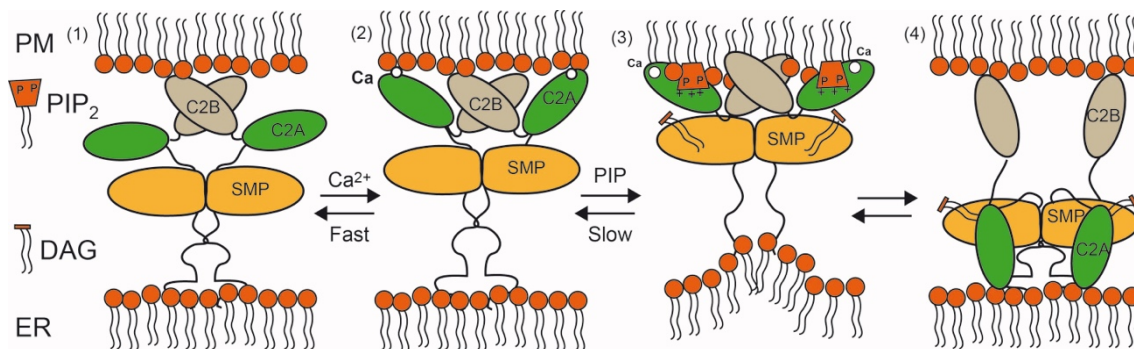

**Figure 7. Schematic representation of the interaction of SYT1 with the ER and PM.** (Step 1) In the resting state SYT1 is anchored to the ER membrane through the N-terminal hydrophobic segment and to the PM through the C2B domain. Stress elicits a fast  $\text{Ca}^{2+}$  signal (Step 2) followed by a slow accumulation of  $\text{PIP}_2$  at the PM (Step 3). This triggers the binding of C2A to the PM. Molecular flexibility provides the basis for intimate adaptation of the C2 domains to the PM and enables a strong interaction. This rearrangement may generate tense molecular conformations and/or membrane distortions that would favor lipid extraction from the membrane and loading to SYT1. The  $\text{PIP}_2$  reduction at PM might enable the binding of C2A to the ER membrane. This may represent the endpoint of the cycle in which DAG is delivered to the ER (Step 4).

**Table 1.** Inflection temperature of SYT1C2A and SYT1C2B in the presence 20  $\mu$ M EGTA and different lipid polar heads.

| Lipid polar heads | SYT1C2A          | C2APolyB       | SYT1C2B    |
|-------------------|------------------|----------------|------------|
| Control           | 57.4 $\pm$ 0.5   | 61.4 $\pm$ 0.1 | 51 $\pm$ 1 |
| IP2               | 59.4 $\pm$ 0.2   | 61.5 $\pm$ 0.1 | -          |
| IP3               | 62.60 $\pm$ 0.05 | 61.4 $\pm$ 0.1 | 51 $\pm$ 1 |
| IP(1,3,4)         | 64.2 $\pm$ 0.1   | 61.4 $\pm$ 0.3 | -          |
| IP(1,4,5,6)       | 62.6 $\pm$ 0.2   | 61.5 $\pm$ 0.3 | -          |
| IP(3,4,5,6)       | 65.2 $\pm$ 0.4   | 61.4 $\pm$ 0.3 | -          |
| Ins               | 56.8 $\pm$ 0.2   | -              | -          |

IP2 inositol 1,4-biphosphate, IP3 inositol 1,4,5-trisphosphate, IP(1,3,4) inositol 1,3,4-trisphosphate, IP(1,4,5,6) inositol 1,4,5,6-tetraphosphate; IP(3,4,5,6) inositol 3,4,5,6-tetraphosphate; Ins Inositol.
